1 **The initiation of the wound healing program is regulated by the convergence of**  
2 **mechanical and epigenetic cues**

3

4

5 Tanay Bhatt<sup>1,2</sup>, Rakesh Dey<sup>1</sup>, Akshay M. Hegde<sup>1</sup>, Alhad Ashok Ketkar<sup>3</sup>, Ajai J.

6 Pulianmackal<sup>1,\*</sup>, Ashim P. Deb<sup>1</sup>, Shravanti Rampalli<sup>3,#</sup>, Colin Jamora<sup>1,δ</sup>

7

8 1. IFOM-inStem Joint Research Laboratory, Center for Inflammation and Tissue  
9 Homeostasis, Institute for Stem Cell Science and Regenerative Medicine,  
10 Bangalore

11 2. National Centre for Biological Sciences, Bangalore

12 3. Center for Inflammation and Tissue Homeostasis, Institute for Stem Cell Science  
13 and Regenerative Medicine, Bangalore

14

15 \* Current address = Department of Molecular, Cellular and Developmental Biology,  
16 University of Michigan

17

18 # Current address = CSIR - Institute for Genomics and Integrative Biology, New Delhi

19

20 δ Corresponding author: Colin Jamora, [colinj@instem.res.in](mailto:colinj@instem.res.in)

21 **ABSTRACT**

22

23 Wound healing in the skin is a complex physiological process that is a product of a cell  
24 state transition from homeostasis to repair. Mechanical cues are increasingly being  
25 recognized as important regulators of cellular reprogramming, but the mechanism by  
26 which it is translated to changes in gene expression and ultimately cellular behavior  
27 remains largely a mystery. To probe the molecular underpinnings of this phenomenon  
28 further, we used the downregulation of caspase-8 as a biomarker of a cell entering the  
29 wound-healing program. We found that the wound-induced release of tension within the  
30 epidermis leads to the alteration of gene expression via the nuclear translocation of the  
31 DNA methyltransferase 3A (DNMT3a). This enzyme then methylates promoters of  
32 genes that are known to be downregulated in response to wound stimuli as well as  
33 potentially novel players in the repair program. Overall, these findings illuminate the  
34 convergence of mechanical and epigenetic signaling modules that are important  
35 regulators of the transcriptome landscape required to initiate the tissue repair process in  
36 the differentiated layers of the epidermis.

37

38 **Graphical Abstract:**

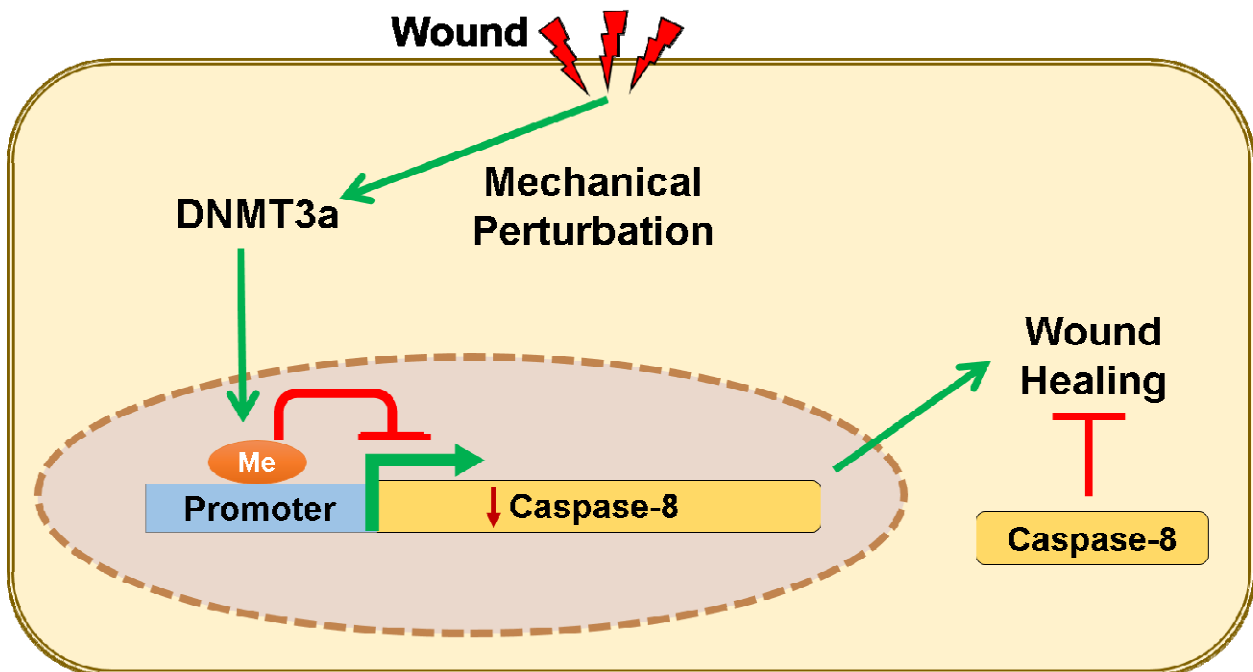

## 39 Introduction

40 The wound healing program in an epithelial tissue is fundamentally a product of cell  
41 state transitions from homeostasis to a repair program. In particular, cutaneous wound  
42 healing in the adult is an intricately regulated system wherein keratinocytes and many  
43 other cell lineages exhibit their plasticity as they undergo reprogramming, to carry out  
44 otherwise dormant functions, to rebuild the damaged skin. Many of the phenomena that  
45 occur in the repair process in adult skin are, in fact, reminiscent of cellular events that  
46 operate during fetal development (1). At the other extreme, inappropriate activation of  
47 these repair processes can manifest as tissue pathology, which forms the foundation of  
48 the perception of diseases with a “wound signature” (2). The question that arises is  
49 how the whole scale changes in gene expression are accomplished in order to facilitate  
50 this cellular reprogramming.

51 Recently, epigenetic regulators have emerged as a vital component capable of  
52 transiently rewiring the cell’s transcriptional program to mediate the continual  
53 regeneration of the mouse epidermis (3, 4). This mode of gene regulation operates at  
54 multiple levels ranging from histone and DNA modifications, chromatin remodeling, and  
55 activity of various subtypes of RNA species such as non-coding RNAs and micro-RNAs  
56 (miRNAs) (5, 6). These epigenetic mechanisms can thus have a profound impact on  
57 the transcriptional landscape of the cell, and can easily be envisioned to participate in  
58 the transient activation or repression of the ~1000 genes that are required for wound  
59 closure (7). However, relative to the appreciation of epigenetics in epidermal  
60 homeostasis, the understanding of its role in wound healing remains an area ripe for  
61 further exploration. Circumstantial evidence in support of a role for epigenetics in tissue  
62 repair comes from reports of their dynamic expression following injury to the skin. For  
63 instance, Ezh2, Suz12, and Eed, which are components of the Polycomb Repressive  
64 Complex 2 (PRC2), are downregulated, whereas the histone methylases JMJD3 and  
65 Utx are upregulated upon tissue damage and all return to homeostatic levels upon the  
66 completion of wound closure (8). While the description of various epigenetic players in  
67 epidermal homeostasis and wound-healing are reported, the identity and function of  
68 their upstream regulators are, to a large extent, absent in the literature.

69 An intriguing candidate for an upstream regulator in a highly tensile tissue such as the  
70 epidermis, are mechanical cues. The epidermis is a stratified epithelium comprised of a  
71 basal layer of proliferation competent keratinocytes and suprabasal layers of  
72 differentiated cells glued together via intercellular adhesion complexes that partly  
73 endows the tissue with its barrier function. In different cell types, changes in  
74 mechanical tension have been documented to induce the nuclear translocation of  
75 important transcription factors - a notable example of which is YAP/TAZ that has  
76 proliferation stimulating gene targets (9). Many studies, including those on epidermal  
77 homeostasis and wound healing, have primarily focused on the changes in gene  
78 expression in proliferating cells (10, 11). On the other hand, differentiated cells, such  
79 as the suprabasal keratinocytes near the surface of the epidermis, have largely been  
80 relegated to bystander status. In spite of this, a few reports suggest that these  
81 neglected pools of differentiated cells are not inert in the cellular crosstalk that mediates  
82 the early responses of the tissue to injury. In particular, the uppermost layer of  
83 differentiated keratinocytes in the epidermis express caspase-8 that has a non-  
84 canonical role in regulating the wound-healing program. We previously demonstrated  
85 that the downregulation of caspase-8 is a natural phenomenon upon application of an  
86 excisional wound to the mouse skin (12). This downregulation is particularly relevant as  
87 genetically ablating caspase-8 in the epidermis is sufficient to induce a wound healing  
88 response even in the absence of any damage to the organ. In addition, the  
89 downregulation of caspase-8 in the upper, differentiated, layer of the epidermis  
90 mediates signaling networks to incite epithelial stem cell proliferation in the epidermis  
91 (12) and the hair follicle (13, 14) to fuel wound closure. We have thus used the  
92 downregulation of caspase-8 as a cellular biomarker to identify the higher order  
93 regulatory machinery that reprograms the cell to enter the wound healing process in  
94 differentiated keratinocytes, which are emerging as an important participant in the tissue  
95 repair program.

96

97 **Wound induce downregulation of caspase-8 RNA correlates with the degree of**  
98 **promoter methylation**

99

100 Previously, we have established the importance of the downregulation of caspase-8  
101 RNA in both physiological (wound healing (12)) as well as pathological (atopic  
102 dermatitis (15) and psoriasis (16)) scenarios. The mechanisms responsible for this  
103 downregulation, however, remains unknown. Uncovering the regulatory machinery of  
104 caspase-8 RNA also holds the promise of understanding the process by which cells  
105 transition from a state of homeostasis to repair. Moreover, it can provide potential new  
106 therapeutic targets for common inflammatory skin diseases where this regulation is  
107 perturbed.

108

109 RNA downregulation can be achieved either via blocking the synthesis and/or active  
110 degradation. In order to distinguish between these two possibilities, we determined the  
111 half-life of caspase-8 in homeostasis compared to wound conditions. In differentiated  
112 primary epidermal keratinocytes, we observed that the half-life of caspase-8 mRNA  
113 under homeostatic conditions in vitro is approximately 2 hours (Figure S1A). In an in  
114 vitro scratch wound assay with multiple scratches, the level of caspase-8 RNA is  
115 significantly reduced by 8 hours (Figure 1A). Since the reduction of caspase-8 is faster  
116 under homeostatic conditions compared to the wound healing context, merely blocking  
117 RNA synthesis can achieve the reduction of caspase-8 mRNA and initiate the  
118 downstream wound healing response. Interestingly, the reduction caspase-8 RNA is  
119 localized in cells near the front of the scratch wound in vitro (Figure 1B, Figure S1B). In  
120 situ hybridization of caspase-8 RNA demonstrates that the downregulation can clearly  
121 be visualized in the cells immediately adjacent to the leading edge of a single scratch  
122 wound as early as 4 hours post wounding. By 8 hours post-wounding, the caspase-8  
123 RNA is downregulated in about 3-4 cell layers from the wound front. These findings  
124 are consistent with our observation in excisional wounds on the back skin of mice where  
125 the decrease of caspase-8 RNA is visible as early as 4 hours in the wound proximal  
126 region (Figure 1C and Figure S1C). Together these results suggest that simply  
127 blocking transcription post injury is sufficient to downregulate caspase-8. We

128 hypothesized that the block in caspase-8 RNA synthesis is achieved through promoter  
129 methylation, which is consistent with previous reports documenting the same  
130 phenomenon in a variety of cancer cells through the hypermethylation of regulatory  
131 DNA sequence(17, 18). To understand whether this process in cancer cells is an  
132 aberration of the physiological healing program, we have assessed the methylation  
133 status of important regulatory sequences in the caspase-8 promoter, namely the CpG  
134 loci and SP1 binding sites (Figure S1D) (19). Analysis of methylation of SP1 sites and  
135 other CpG loci reveals a time-dependent increase of promoter methylation in a sheet of  
136 differentiated epidermal keratinocytes subjected to multiple scratch wounds (Figure 1D).  
137 This progressive increase in the methylation of the caspase-8 promoter correlates well  
138 with the kinetics of the decrease in caspase-8 RNA (Figure 1A-C). This suggest DNA  
139 methylation may play a critical role in regulating the wound-healing response.

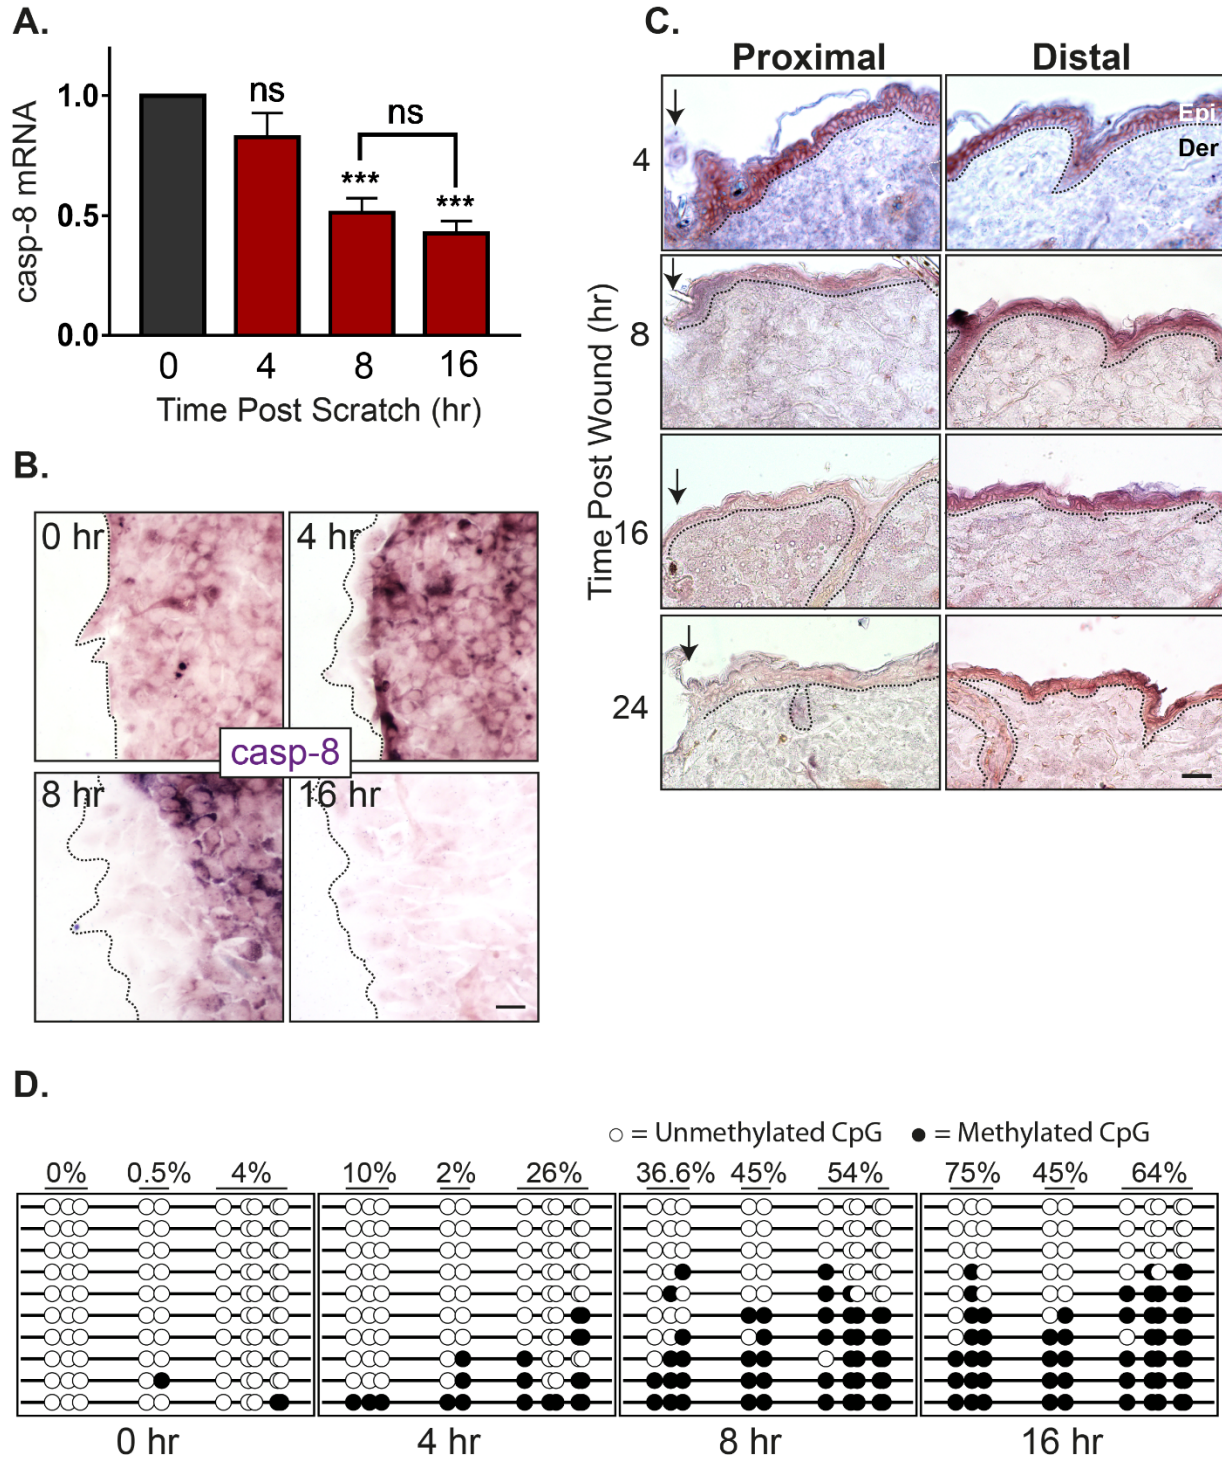

140

141 **Figure 1: Kinetics of caspase-8 promoter methylation and expression: A,** Levels of

142 caspase-8 mRNA at different time-points post scratch wound (fold change) (n=4) **B,** In-

143 vitro ISH of caspase-8 mRNA showing its levels at scratch-margins over time [scale =

144 10  $\mu\text{m}$ ] **C**, In-vivo ISH of caspase-8 mRNA showing its levels at wound proximal and  
145 distal regions over time (dotted line represents basement membrane, Epi = Epidermis,  
146 Der = Dermis) [scale = 20  $\mu\text{m}$ ] **D**, Bisulphite sequencing of caspase-8 promoter proximal  
147 region (265bp) shows methylation status of 10 individual CpG sites (columns) from 10  
148 cloned PCR products (rows) at various time-points post scratch wound. Percentage  
149 value denotes the percent methylation for each group of CpG sites over time (Refer  
150 Figure S1D for the sequenced region and primer sites). (Data are shown as  
151 mean  $\pm$  SEM, P values were calculated using one-way ANOVA with Dunnett's test  
152 and two-tailed t test (A), \*\*\*  $P \leq 0.001$ , ns =  $P > 0.05$ )



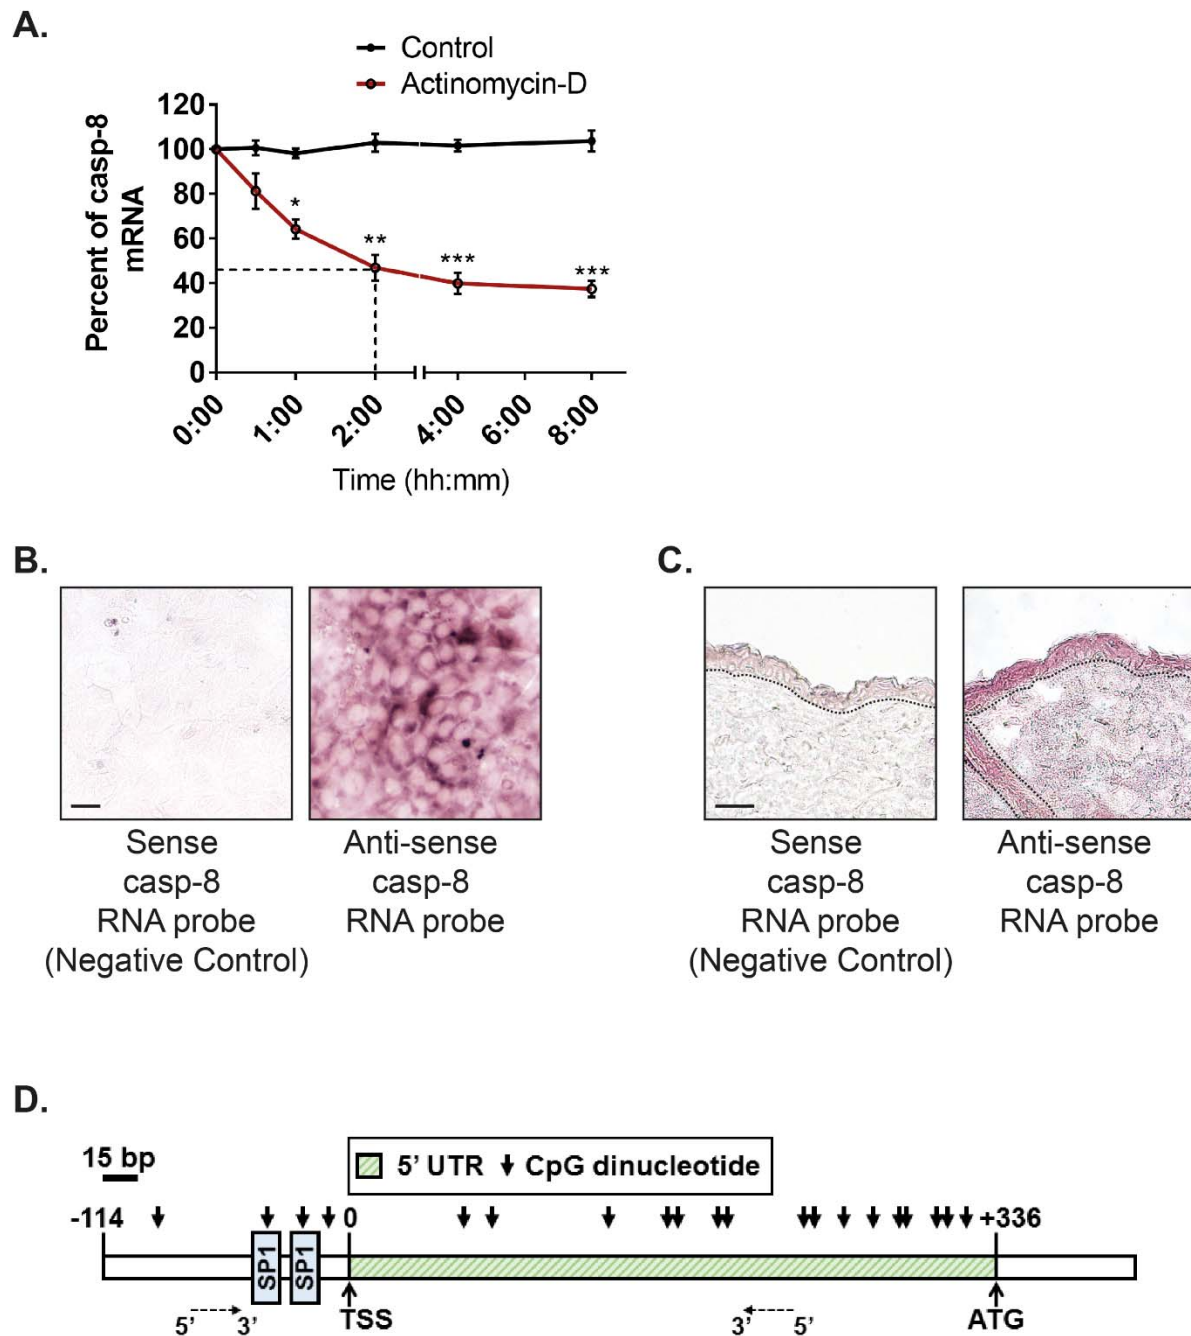

153 **Figure S1: caspase-8 RNA half-life and CpG positions on its promoter proximal**  
 154 **region**

155 **A**, Quantification of caspase-8 mRNA to check its half-life post transcriptional block  
 156 (using Actinomycin-D) **B**, In-situ hybridization with anti-sense and sense probe of

157 caspase-8 RNA (in-vitro) [scale = 10  $\mu$ m] **C**, In-situ hybridization with anti-sense and  
158 sense probe of caspase-8 RNA (in-vivo) [scale = 20  $\mu$ m] **D**, Model showing positions of  
159 CpG dinucleotide and SP1 binding sites in caspase-8 promoter proximal region (Data  
160 are shown as mean  $\pm$  SEM, P values were calculated using one-way ANOVA with  
161 Dunnett's test (A), \* P  $\leq$  0.05, \*\* P  $\leq$  0.01, \*\*\* P  $\leq$  0.001, ns = P > 0.05)

162 **Wound stimuli induce the nuclear localization of the DNA methyltransferase**  
163 **DNMT3a**

164

165 We thus investigated the mechanism responsible for DNA methylation of the caspase-8  
166 promoter in response to injury. The bisulfite sequencing data reveals that the  
167 methylation of the caspase-8 promoter is a de novo event in response to wounding. We  
168 therefore examined the status of the two known de novo DNA methyltransferases  
169 (DNMTs), namely DNMT3a and DNMT3b, in response to injury. Interestingly, de-novo  
170 DNMTs (DNMT3a and 3b) have also been shown to be important in regulating  
171 epidermal stem cell homeostasis (4). To investigate whether these enzymes likewise  
172 play a role in tissue repair, we examined their expression in the wounded epidermis.  
173 Consistent with a previous report, under homeostatic conditions, we found that DNMT3a  
174 mainly resides in the nucleus of the basal/proliferating (K5 positive) cells and is absent  
175 or cytoplasmic in the suprabasal/differentiated (K5 negative) keratinocytes (Figure S2A-  
176 B) (20). This localization was also recapitulated in vitro wherein we observed the  
177 cytosolic localization of DNMT3a in differentiated primary epidermal keratinocytes  
178 (Figure S2C). Interestingly, in vivo we observed that DNMT3a undergoes cytoplasmic to  
179 nuclear translocation in cells adjacent to the wound (Figure 2A). Quantification of the  
180 nuclear vs. cytoplasmic localization of DNMT3a revealed a time dependent  
181 accumulation of the enzyme in the nucleus post wounding (Figure 2B). This  
182 phenomenon was more apparent in an in vitro scratch assay, where keratinocytes  
183 adjacent to the scratch exhibited nuclear localization of DNMT3a (Figure 2C). The  
184 second known de-novo DNMT, DNMT3b, also showed cytoplasmic localization in  
185 differentiated keratinocytes (Figure S2D). However, it did not translocate to the nuclei of  
186 scratch proximal keratinocytes (Figure S2E).

187

188 Thus, we focused on understanding the mechanistic details of DNMT3a's role in  
189 regulating wound-healing program. The increase in DNMT3a nuclear localization was  
190 time dependent, affecting wound proximal keratinocytes first and then moves towards  
191 distal cells. At the completion of the wound-healing program we observe that DNMT3a  
192 localization is again prominent within the cytoplasm of differentiated (K5 negative)

193 keratinocytes, while nuclear localization is restricted to cells in the basal layer of the  
194 epidermis (Figure S2F). In conclusion, we observe that the DNMT3a shows significant  
195 nuclear localisation in the wound-proximal (leading edge) cells within 4 hours of the  
196 injury and the localisation pattern further penetrates in the distal regions as time passes  
197 (Figure 2C). The nuclear localization kinetics also correlates with the pattern of  
198 caspase-8 downregulation as well as promoter methylation (Figure 1B-D).

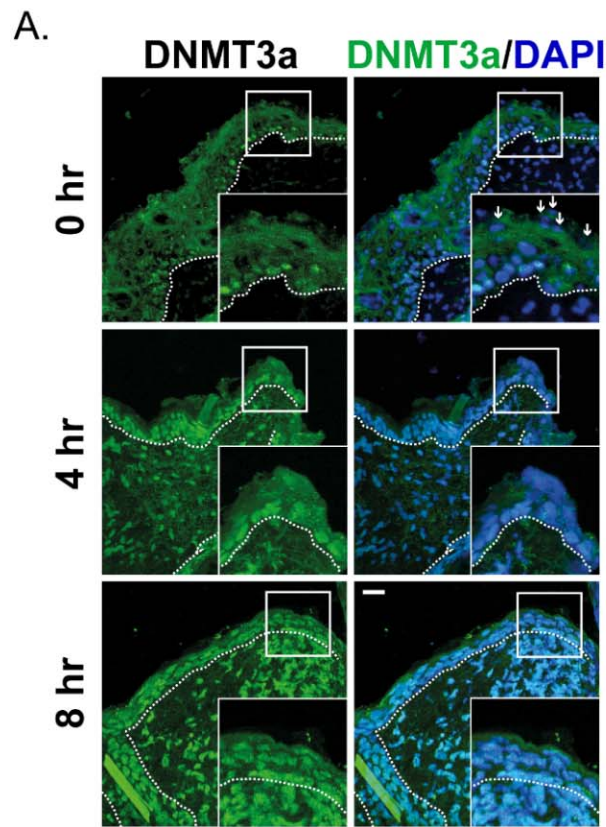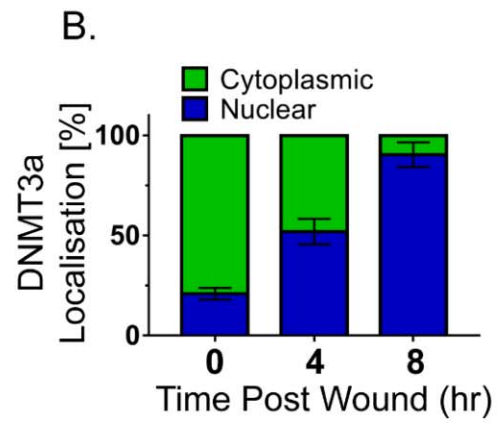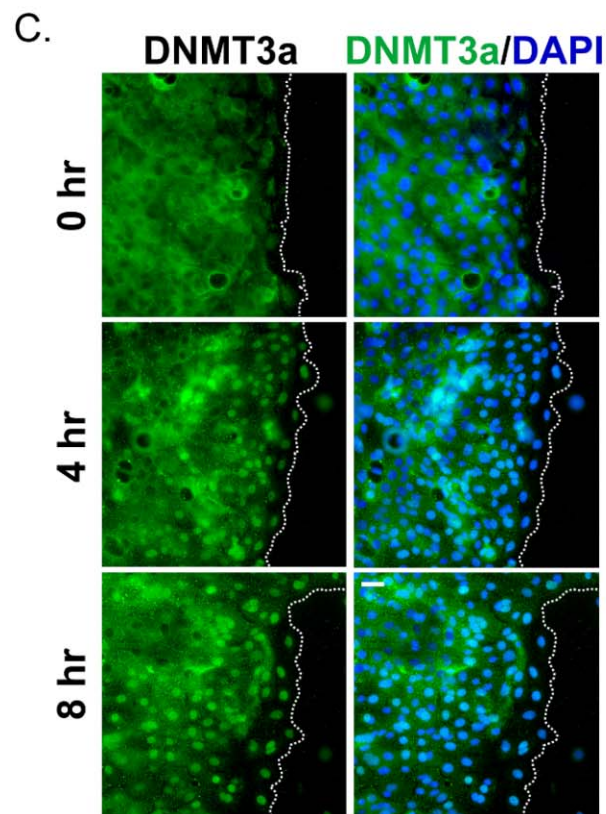

200 **Figure 2: A**, DNMT3a and DAPI staining of wound proximal (<0.5 mm) skin sections at  
201 different time interval (small white arrows showing nuclei of suprabasal keratinocytes,  
202 negative for DNMT3a staining. **B**, Quantification and kinetics of DNMT3a localization  
203 (nuclear v/s cytoplasmic) from wound proximal ( $\leq 100\mu\text{m}$ ) skin sections. (it represents  
204 quantification of differentiating keratinocytes from the skin sections of three separate  
205 biological replicates) **C**, DNMT3a and DAPI staining of scratch wounded in vitro  
206 differentiated keratinocyte layer [scale = 20  $\mu\text{m}$ ]

207

208

A.

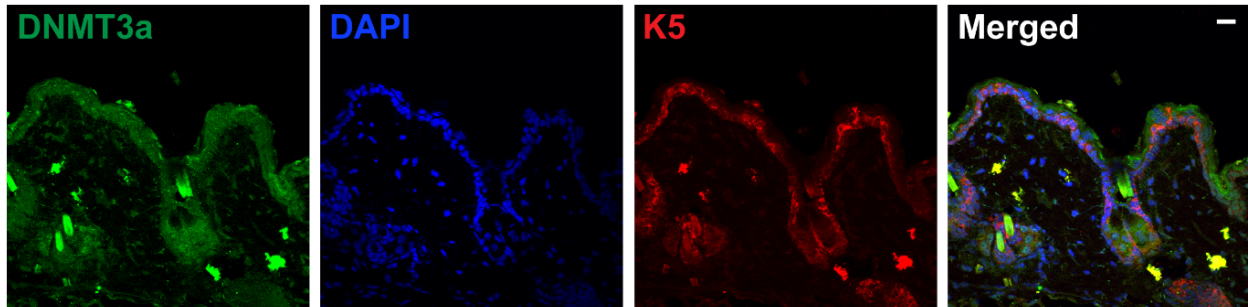

B'.

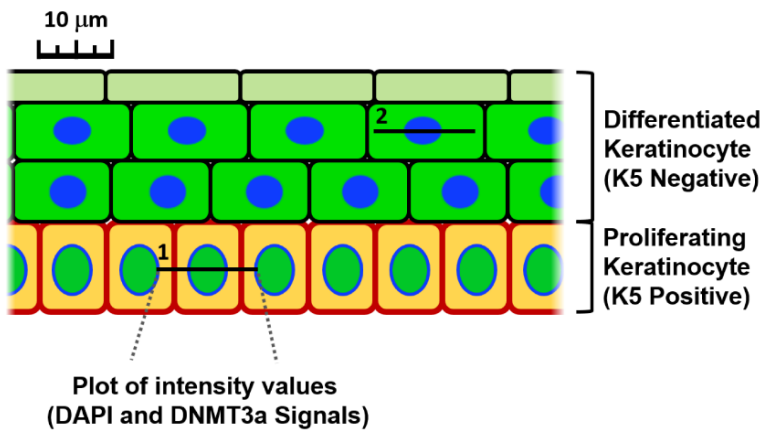

B''.

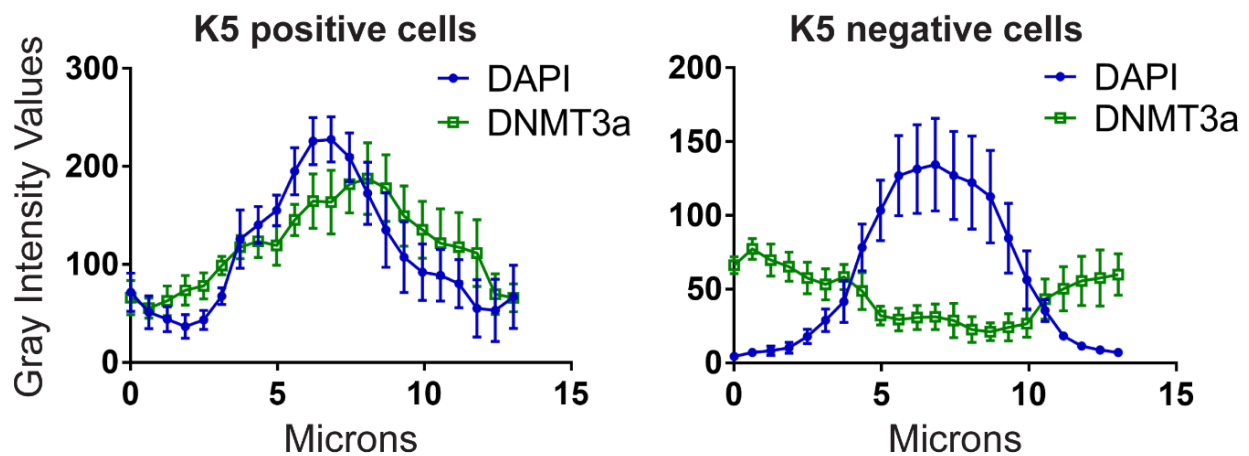

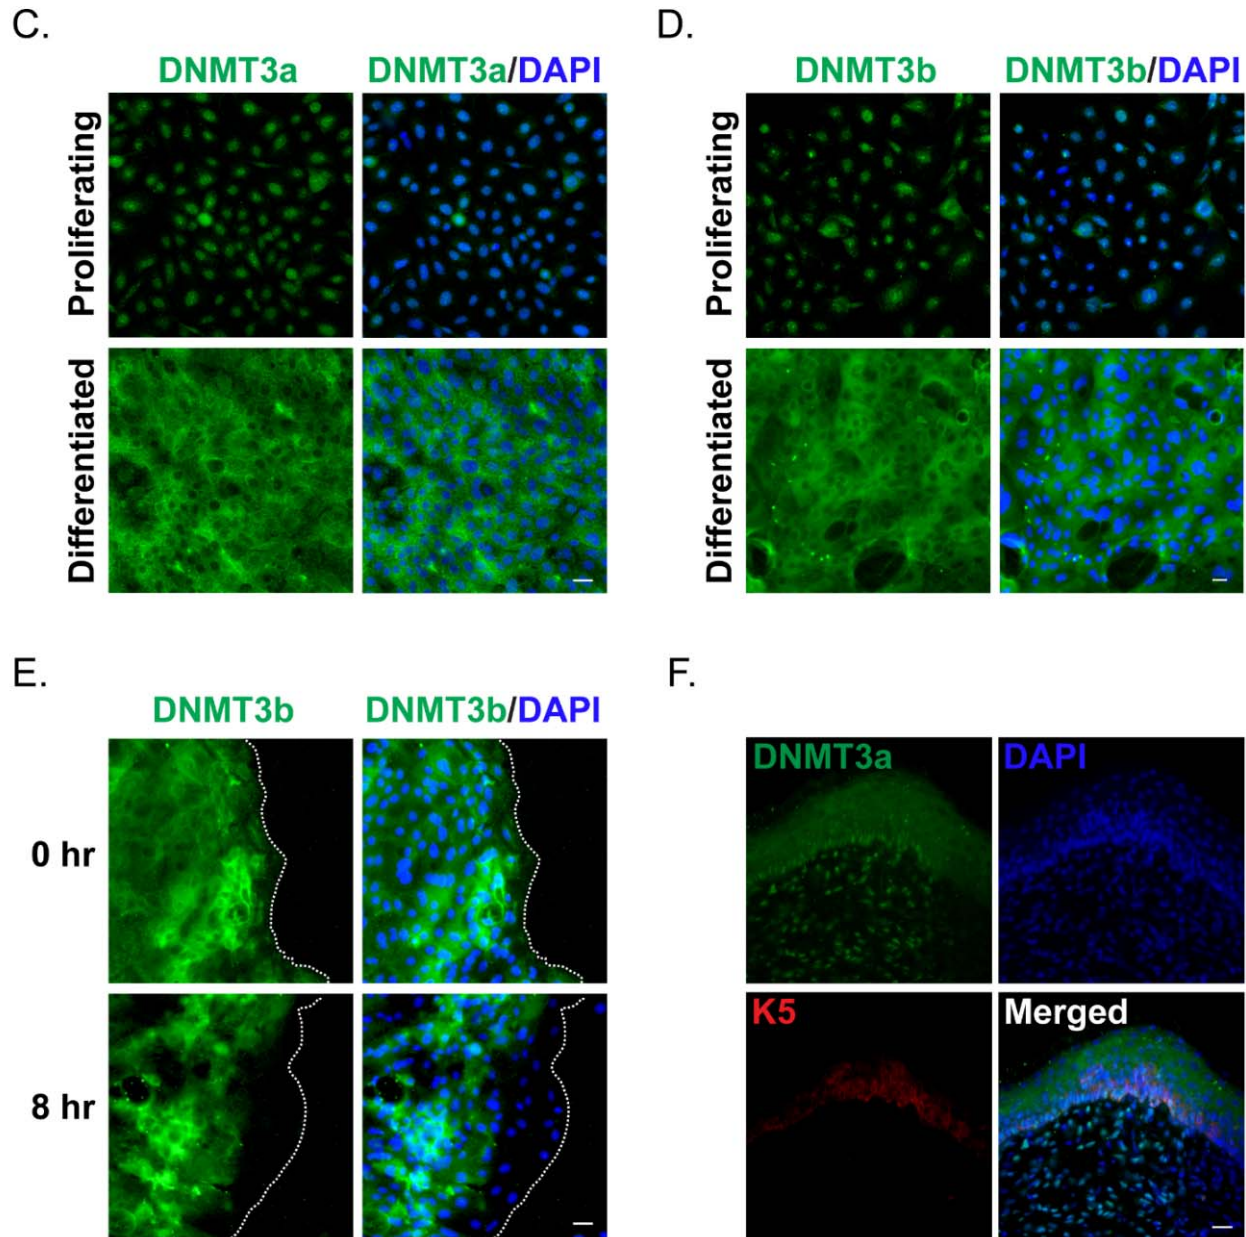

209

210 **Figure S2: A**, Representative image of unwounded/wound-distal skin section stained  
211 with DNMT3a, DAPI and K5. **B'**, A model showing the quantification method of DAPI  
212 and DNMT3a stain intensities over the line of interest (1, 2) from proliferating and  
213 differentiated keratinocytes, followed by **B''** the plots of intensity values (gray unit).  
214 Staining of in vitro proliferating and differentiated keratinocytes with **C**, DNMT3a/DAPI  
215 and **D**, DNMT3b/DAPI. **E**, DNMT3b/DAPI staining of scratch wounded in vitro



216 differentiated keratinocytes. **F**, DNMT3a, DAPI and K5 staining of a completely healed  
217 mouse skin section [scale = 20  $\mu$ m]

## 218 **DNMT3a directly regulates caspase-8 expression**

219

220 We further explored whether the de-novo DNA methylation of caspase-8 promoter is the  
221 result of DNMT3a's direct binding to this region (Figure S1B). This was accomplished  
222 with the use of Chromatin Immunoprecipitation (ChIP) to assess the level of DNMT3a  
223 occupancy on the caspase-8 promoter pre- and post-scratch wound. We found that  
224 scratch wounds lead to the higher occupancy of DNMT3a on caspase-8 promoter,  
225 which is not seen in the case of DNMT3b (Figure 3A). To understand the functional  
226 relevance of DNMT activity in maintaining caspase-8 levels, we pre-treated the  
227 differentiated keratinocytes with a generic DNMT inhibitor (5-Aza-2'-deoxycytidine). We  
228 observed that the inhibitor treated cells were unable to downregulate caspase-8 mRNA  
229 in a scratch wound assay (Figure S3A). To specifically assess the role of DNMT3a, we  
230 performed shRNA mediated knockdown of DNMT3a (Figure S3B). Compared to the  
231 scrambled RNA controls, keratinocytes with reduced DNMT3a expression were unable  
232 to downregulate caspase-8 in response to scratch wound (Figure 3B). We further  
233 analysed whether failure of caspase-8 mRNA downregulation was due to the absence  
234 of promoter methylation. Indeed, scratch-wounded keratinocytes, transduced with  
235 DNMT3a shRNA, showed significantly reduced DNA methylation pattern on the  
236 caspase-8 promoter compared to scrambled RNA control (Figure 3C).

237

238 Promoter activities are often dependent on the associated histone modifications. These  
239 histone marks generally guide the DNA methylation at a particular genic region and  
240 vice-a-versa(21–23). DNMT3a occupancy and activity has also been shown to be  
241 influenced by the methylation status of certain lysine (K) residues on the histone 3 (H3)  
242 tail(22, 24). To investigate the core machinery required for DNMT3a mediated  
243 methylation on the caspase-8 promoter, we assessed several activation and repression  
244 histone marks in scratch wounded keratinocytes (Figure 3D). We observed that two  
245 transcriptional activation marks, H3K9ac and H3K4me3, are decreased at the caspase-  
246 8 promoter. On the other hand, the H3K9me3 mark, which is associated with  
247 transcriptional repression, was significantly increased at the caspase-8 promoter  
248 following wounding. Interestingly, another classical repressive mark, H3K27me3, did not

249 show a significant change. It is possible that the caspase-8 proximal promoter is  
250 another example of a bivalent promoter (25) having both activation (H3K9ac and  
251 H3K4me3) and repression (H3K27me3) marks. In this scenario, then, wound-mediated  
252 repression of caspase-8 is achieved via reduction of both H3K9ac and H3K4me3 along  
253 with an increase in the H3K9me3 mark and DNMT3a occupancy. These results  
254 establish the mechanism by which DNMT3a localizes to the caspase-8 promoter. An  
255 outstanding question is whether DNMT3a is required for a proper wound healing  
256 response. To address this issue, we tested the effect of the knockdown of DNMT3a in a  
257 scratch wound assay (Figure 3E). We found that keratinocytes with decreased  
258 DNMT3a exhibited an impaired wound closure response, thereby illustrating the  
259 necessity of this methyltransferase in the proper repithelialization of an in vitro wound.

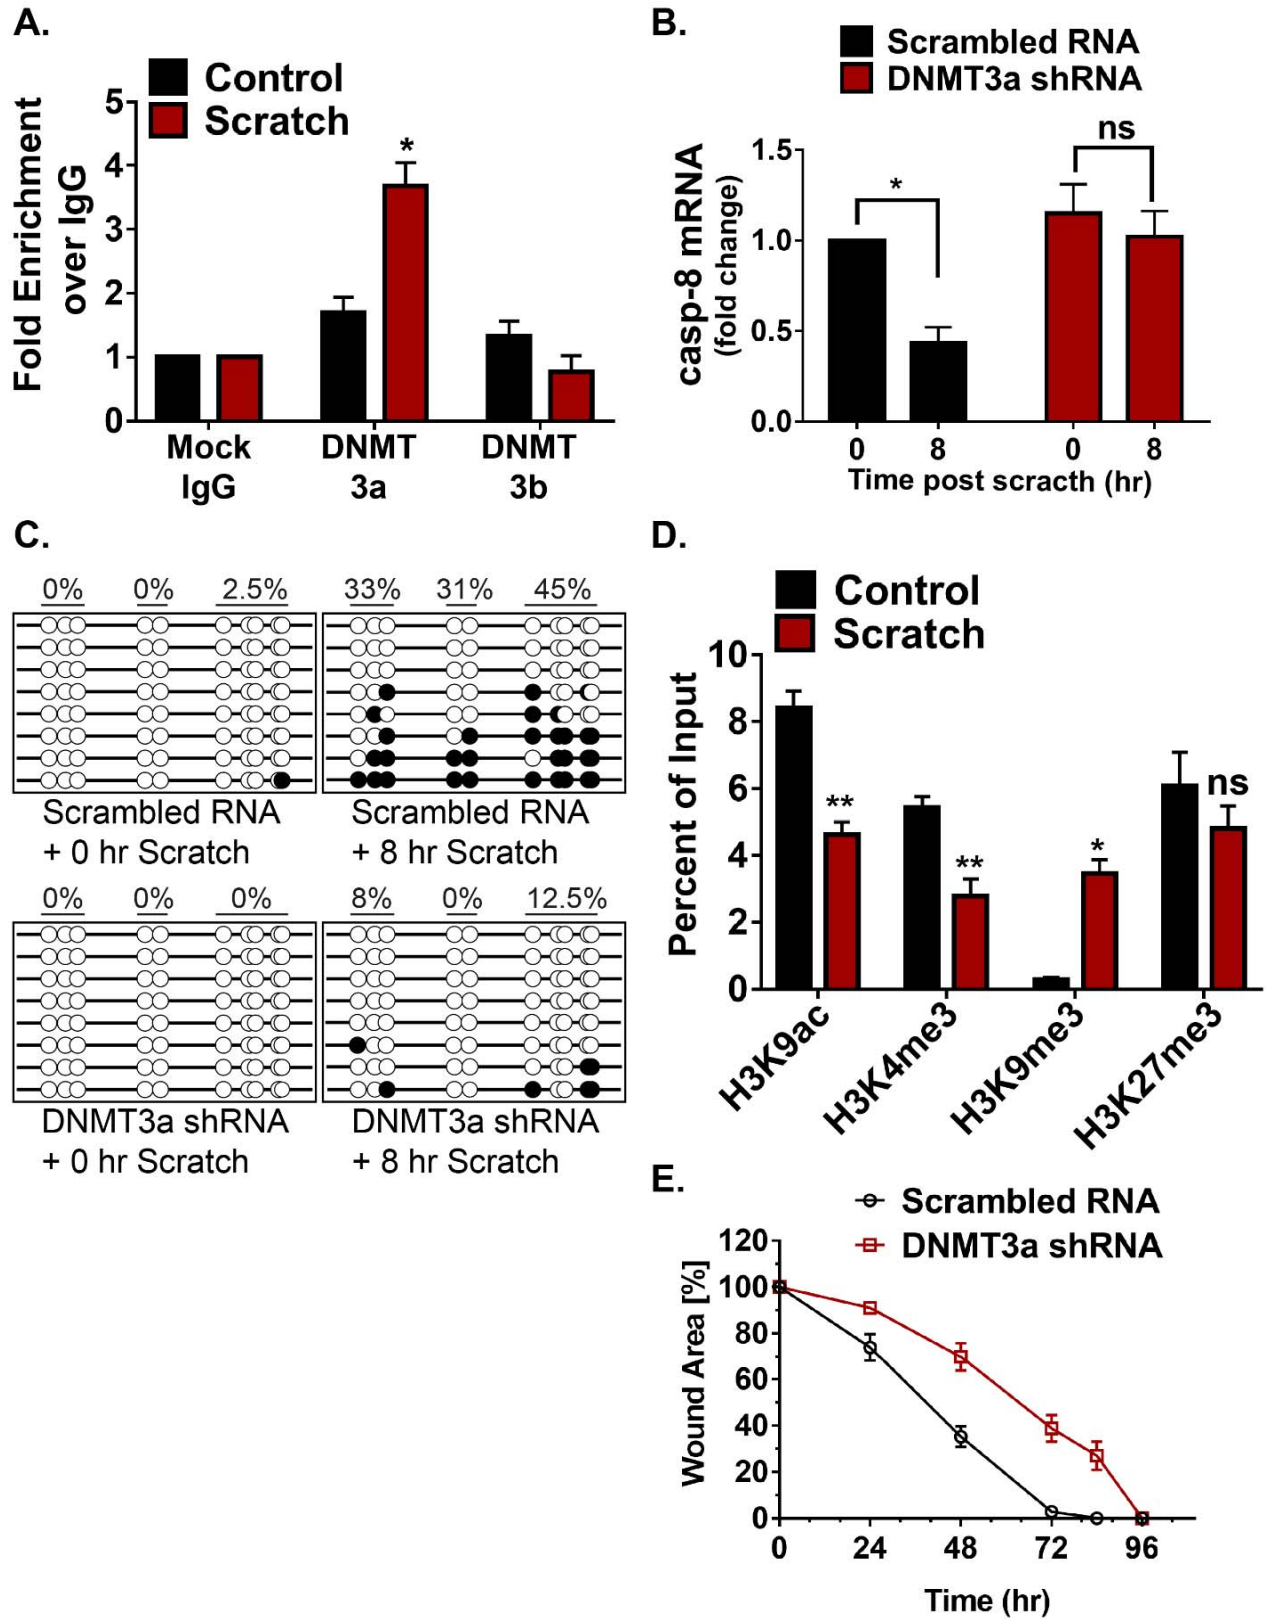

261

262 **Figure 3: Involvement of DNMT3a and histone modification in regulating caspase-**

263 **8 expression: A**, ChIP-qPCR analysis to check DNMT3a and DNMT3b occupancy at

264 caspase-8 promoter in control and scratch-wounded keratinocytes (n=3) **B**, qPCR

265 analysis of caspase-8 mRNA in scratch-wounded keratinocytes, transduced with either

266 scrambled RNA or DNMT3a shRNA (n=3) **C**, DNA methylation status of caspase-8

267 promoter in scratch-wounded keratinocytes, transduced with either scrambled RNA or

268 DNMT3a shRNA **D**, ChIP-qPCR analysis of H3K9ac, H3K4me3, H3K9me3, and

269 H3K27me3 at caspase-8 promoter in control and scratch-wounded keratinocytes (n=3)

270 **E**, Effect of DNMT3a downregulation on in vitro wound healing assay (Data are shown

271 as mean  $\pm$  SEM, P values were calculated using two tailed t-test (A, B, D), \* P  $\leq$  0.05,

272 \*\* P  $\leq$  0.01, \*\*\* P  $\leq$  0.001, ns = P > 0.05)

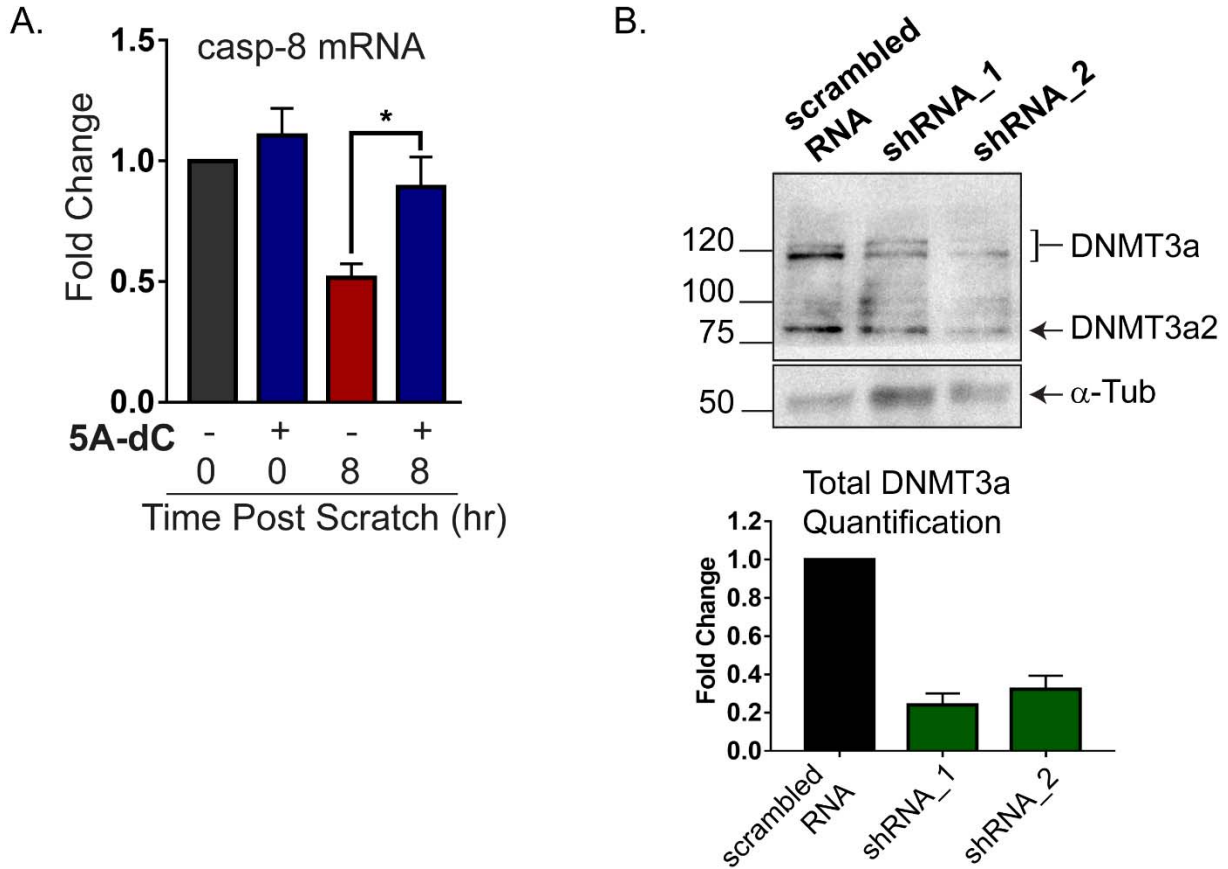

273

274 **Figure S3: A**, qPCR analysis of caspase-8 mRNA in scratch-wounded keratinocytes,  
275 pre-treated with 5-Aza-2'-deoxycytidine (5A-dC) or DMSO (n=3) **B**, western blot  
276 analysis from keratinocytes transduced with scrambled RNA or DNMT3a shRNA ( $\alpha$ -Tub  
277 = alpha-tubulin) (Data are shown as mean  $\pm$  SEM, P values were calculated using two  
278 tailed t-test (A), \* P  $\leq$  0.05, \*\* P  $\leq$  0.01, \*\*\* P  $\leq$  0.001, ns = P > 0.05)

## 279 **Effect of cellular tension on DNMT3a localization and caspase-8 expression**

280

281 We observed that caspase-8 downregulation and DNMT3a nuclear localization initiate  
282 at the edge of wound site (Figure 1, 2). Given that these are early responses to injury,  
283 understanding the mechanistic basis of this phenomena can provide insights into the  
284 broader process of cellular wound sensing. The keratinocytes in the epithelial sheet are  
285 strongly connected to each other and an event of injury will result in the sudden  
286 relaxation in that tension, particularly in the cells at the boundary of the wound.  
287 Interestingly the expanding number of cells exhibiting the downregulation of caspase-8  
288 RNA in the scratch wound assay over time (Figure 1A) closely parallels the changes in  
289 traction force previously reported for the collective cell migration of an epithelial sheet  
290 following a scratch wound (26). We therefore investigated whether release of tension,  
291 caused by the severing of the epithelial sheet, can impact DNMT3a subcellular  
292 localization and subsequently caspase-8 expression. As shown in Figure S4a,  
293 modulation in cellular tension can be achieved via targeting the components of the  
294 adherens junction, which are known to play a role in generating and maintaining cellular  
295 tension (27, 28).

296 We observed that tension release by disrupting calcium-dependent E-cadherin junctions  
297 via EGTA treatment resulted in the nuclear localization of DNMT3a (Figure 4A).  
298 Similarly, releasing cellular tension endowed by Non Muscle Myosin II (NM-II) with the  
299 pharmacological inhibitor of NMII, blebbistatin, induced the DNMT3a's nuclear  
300 translocation from the cytosol (Figure 4A). Furthermore, we examined the effect of  
301 blocking release of cellular tension in a scratch wounded sheet of epidermal  
302 keratinocytes. The release of tension was blocked by pre-treating keratinocytes with  
303 calyculin-A, which inhibits myosin light chain phosphatase, thereby maintaining the  
304 active state of NMII (29). The treatment of keratinocytes with calyculin-A prior to  
305 scratch wounding blocked the nuclear translocation of DNMT3a that was observed in  
306 cells treated with vehicle control (Figure 4B).

307 In addition to a pharmacological approach, we also modulated cellular tension by  
308 altering the substrate stiffness on which the keratinocytes were growing. This was  
309 accomplished by utilizing polyacrylamide gels of various stiffness, which would alter

310 cellular tension. We observed that differentiated keratinocytes seeded on “soft” matrices  
311 ranging from 10 kPa to 40 kPa mostly harboured DNMT3a in the nuclei (Figure 4C).  
312 However, cells grown on a “stiffer” matrix (100kPa) predominantly showed a  
313 cytoplasmic localization of DNMT3a.  
314 We then evaluated whether DNMT3a’s dynamic localization in response to  
315 pharmacological and mechanical alterations in cellular tension has any transcriptional  
316 consequences. We observed that in all the scenarios where DNMT3a nuclear  
317 localization was favored (scratch wounds, EGTA/blebbistatin treatment, soft substrates),  
318 caspase-8 RNA was downregulated compared to their respective controls (Figure 4D).  
319 On the otherhand, inhibition of DNMT3a’s nuclear localization (via calyculin-A, or a stiff  
320 substrate) resulted in the failure of caspase-8 downregulation in spite of a scratch  
321 wound. These results suggest that keratinocytes organized within an epithelial sheet  
322 can translate changes in tensile forces into cellular reprogramming via epigenetic means.



323

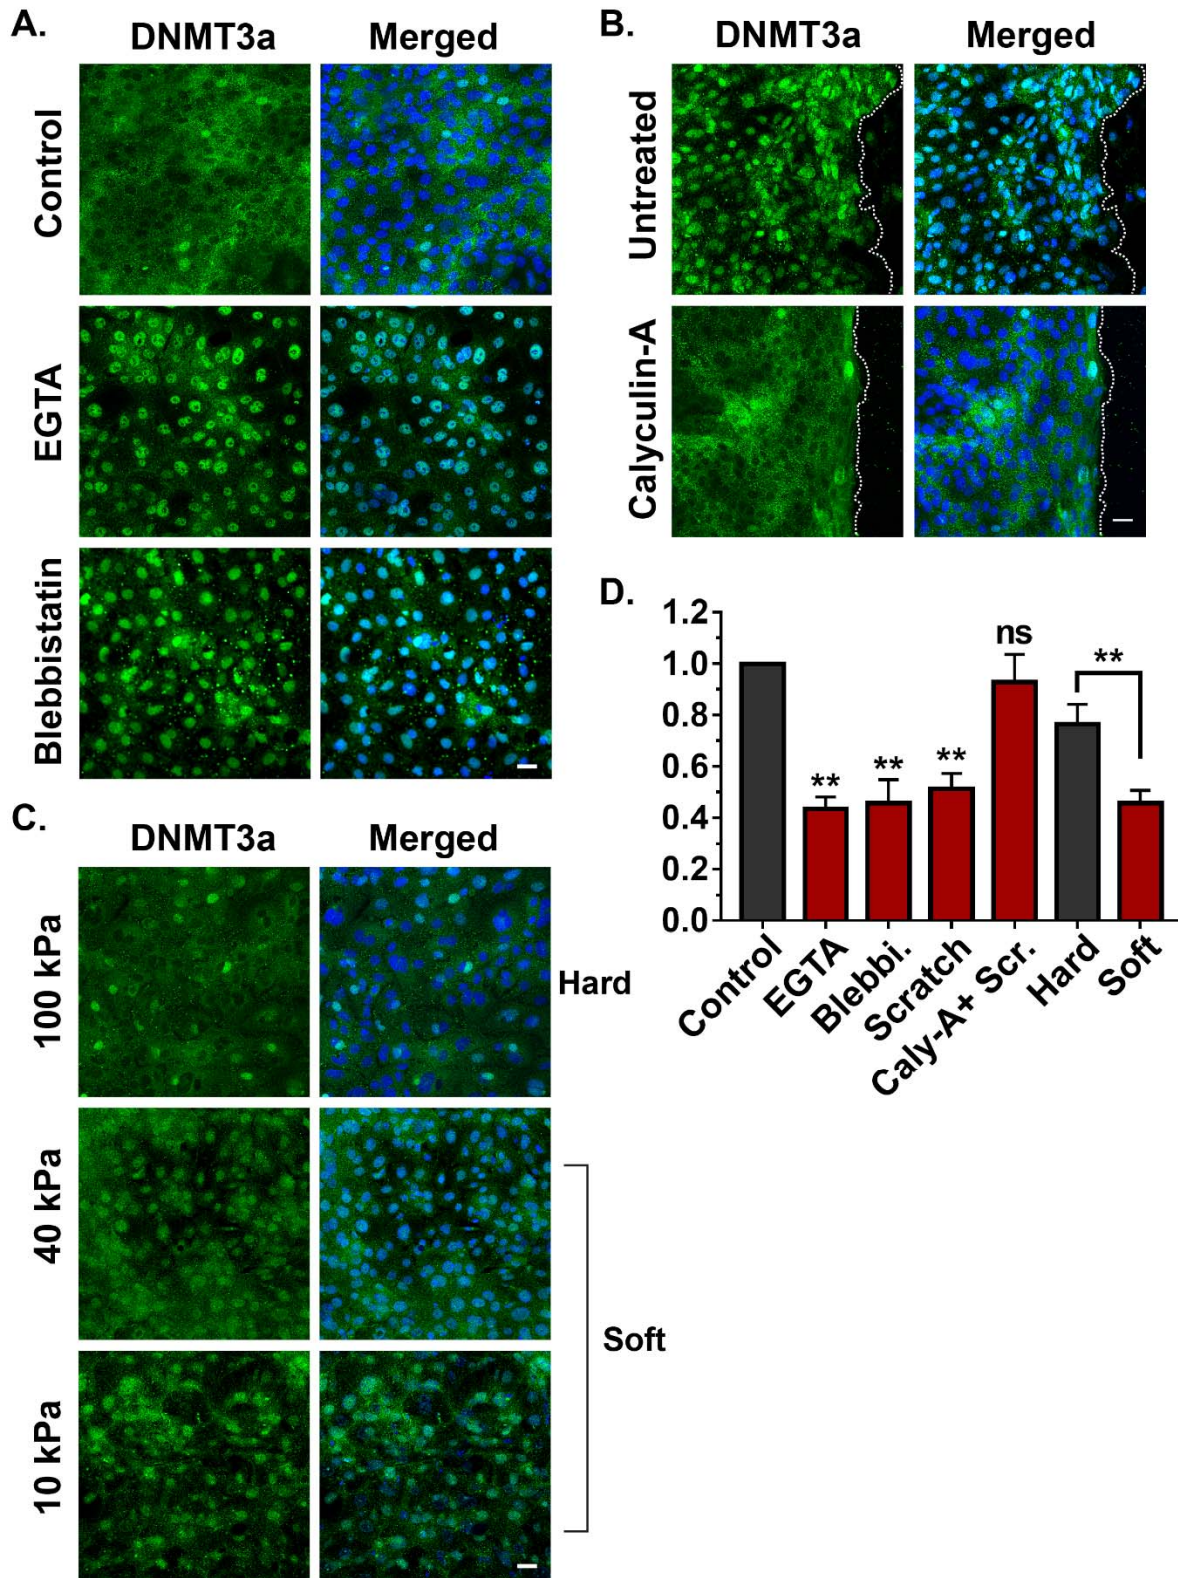

324

325 **Figure 4 Effect of cellular tension on DNMT3a localization and caspase-8**  
326 **expression: A, Effect of EGTA and Blebbistatin on the localisation of DNMT3a B,**  
327 **Effect of scratch wound DNMT3a localisation in presence and absence of calyculin-A**  
328 **C, Effect of various matrix stiffness on the localisation of DNMT3a D, Fold change in the**  
329 **levels of caspase-8 mRNA as a result of various pharmacological and mechanical**  
330 **approaches of tension modulation (n=3), [scale bar = 20  $\mu$ m] (Data are shown as**  
331 **mean  $\pm$  SEM, P values were calculated using two tailed t-test (D), \* P  $\leq$  0.05, \*\* P  $\leq$**   
332 **0.01, \*\*\* P  $\leq$  0.001, ns = P > 0.05)**

333  
334  
335  
336  
337

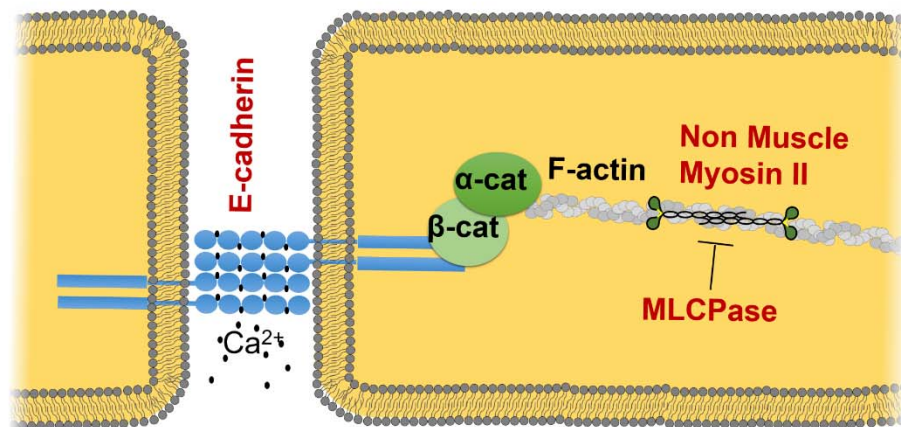

338  
339 **Figure S4:** Model showing various potential protein molecules (red labels) involved in  
340 generating and/or sensing the cellular tension

341 **DNA methylation could be a global regulator of gene expression to initiate**  
342 **wound-healing program**

343  
344 We further assessed whether the downregulation of caspase-8 is a paradigm for the  
345 global downregulation of genes to achieve a cell state transition from homeostasis to  
346 wound healing. Surprisingly, the transcriptome profile of scratch wounded  
347 differentiated keratinocytes has not been reported even though these layers are the first  
348 to encounter damage in vivo. Thus we performed RNA sequencing of wounded v/s  
349 unwounded primary mouse keratinocyte that were differentiated via the calcium switch  
350 protocol (Figure 5A). The analysis of the transcriptome data revealed that the number  
351 of downregulated genes outnumbered the upregulated genes post injury. We verified  
352 the sequencing data by specifically analysing genes via qPCR that have already been  
353 implicated in wound healing or epidermal development (Figure 5B and C). Interestingly,  
354 there was an inverse correlation with the RNA expression and the degree of methylation  
355 for many of the genes we interrogated. This suggest that DNA methylation could be a  
356 global regulator for a set of wound response genes (in addition to caspase-8), needed  
357 for the wound healing program.

358 Analysis of transcriptome data has revealed many such group of genes and their  
359 biological processes. (Figure S5). Of particular interest were the downregulation of  
360 genes involved in the differentiation of keratinocytes. The Ghazizadeh lab has reported  
361 evidence of dedifferentiation of suprabasal keratinocytes as a mode of aiding cutaneous  
362 regeneration and repair. Interestingly, the regeneration of skin epithelia by differentiated  
363 epidermal cultures was found to be facilitated by the capacity of these cells to proliferate  
364 (30). The transcriptome profile of scratch wounded differentiated keratinocytes reveals  
365 an upregulation of cell cycle associated genes that is consistent with this report.  
366 Consequently, the convergence of mechanical and epigenetic cues appears to play an  
367 important role in the plasticity of differentiated epidermal keratinocytes in cutaneous  
368 repair and regeneration. The processes that occur during the wound healing phases of  
369 inflammation, proliferation, and tissue remodeling are often reproduced in a deregulated  
370 manner in many pathologies leading to the notion of diseases with a “wound signature”.  
371 Prominent among these is the view of cancer as an overhealing wound (31). As we

372 noted earlier, there is a body of literature demonstrating that the downregulation of  
373 caspase-8 in cancer cells is accompanied with the methylation of its promoter region  
374 (32–35). In addition, we have previously demonstrated that inflammatory human skin  
375 diseases such as atopic dermatitis (15) and psoriasis (16) likewise exhibit a loss of  
376 epidermal caspase-8. To probe a possible link between caspase-8 downregulation and  
377 methyltransferase expression, we utilized the imiquimod-induced model of psoriasis in  
378 mice. In the psoriatic skin of mice, we observed robust nuclear localisation of DNMT3a  
379 in all the epidermal layers, whereas in the control animals, nuclear DNMT3a was  
380 primarily localized in the basal keratinocytes (Figure 5D). Altogether, this suggests that  
381 the epigenetic regulation governing the cell state transition in wound healing is usurped  
382 in many diseases ranging from inflammatory skin diseases to carcinomas.

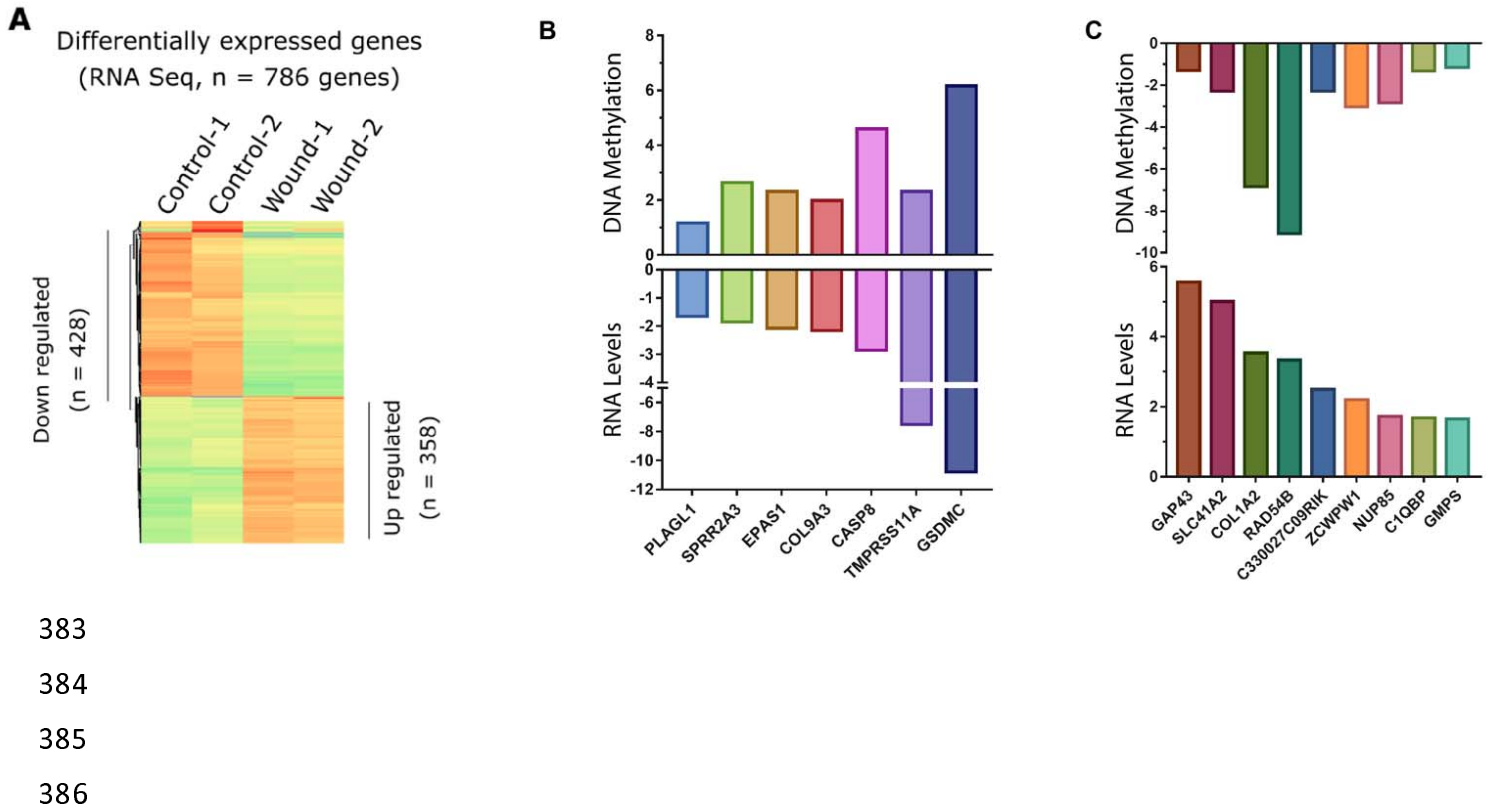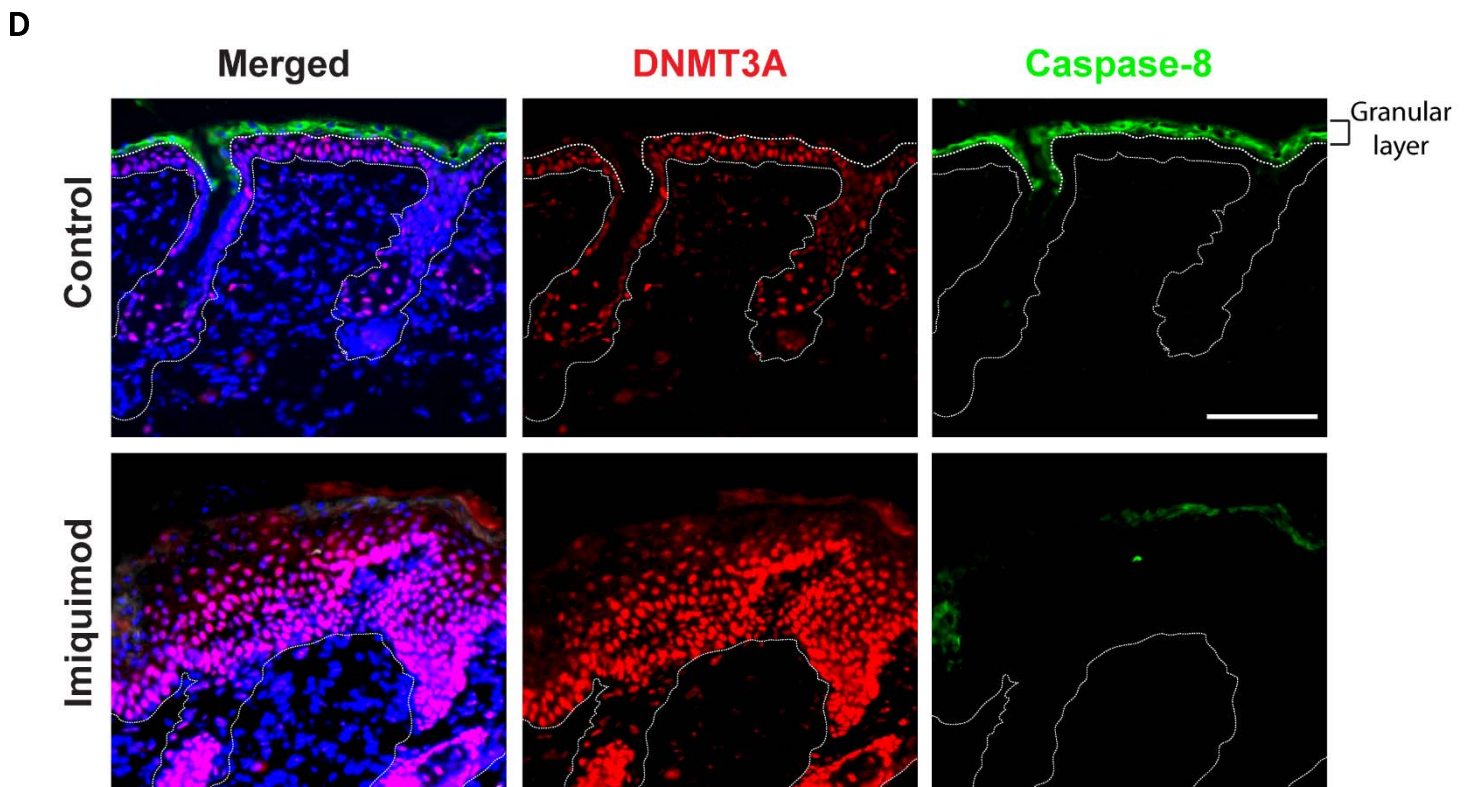

387 **Figure 5: A**, Heat map of differentially regulated genes in Control and Scratch wounded  
388 keratinocytes. **B**, Transcriptionally downregulated genes and their associated DNA  
389 methylation levels **C**, Transcriptionally upregulated genes and their associated DNA  
390 methylation levels. (MeDIP-qPCR, y-axis = fold change compared to control) **D**,  
391 DNMT3a and caspase-8 staining of Control and Psoriatic mouse skin (induced through  
392 imiquimod treatment). [scale bar = 100  $\mu$ m]

### Gene Ontology (Biological Process) of Downregulated Genes

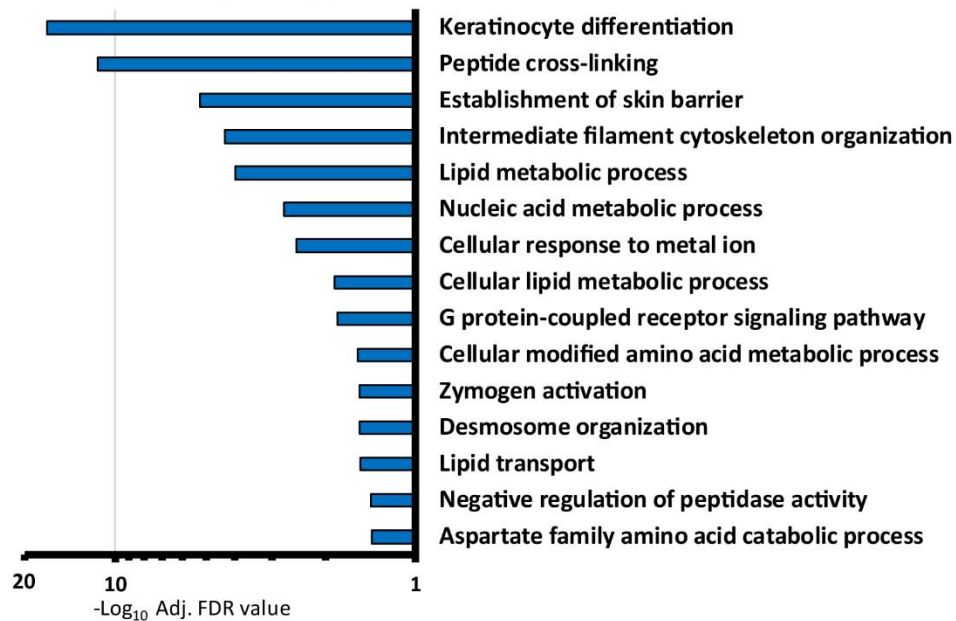

### Gene Ontology (Biological Process) of Upregulated Genes

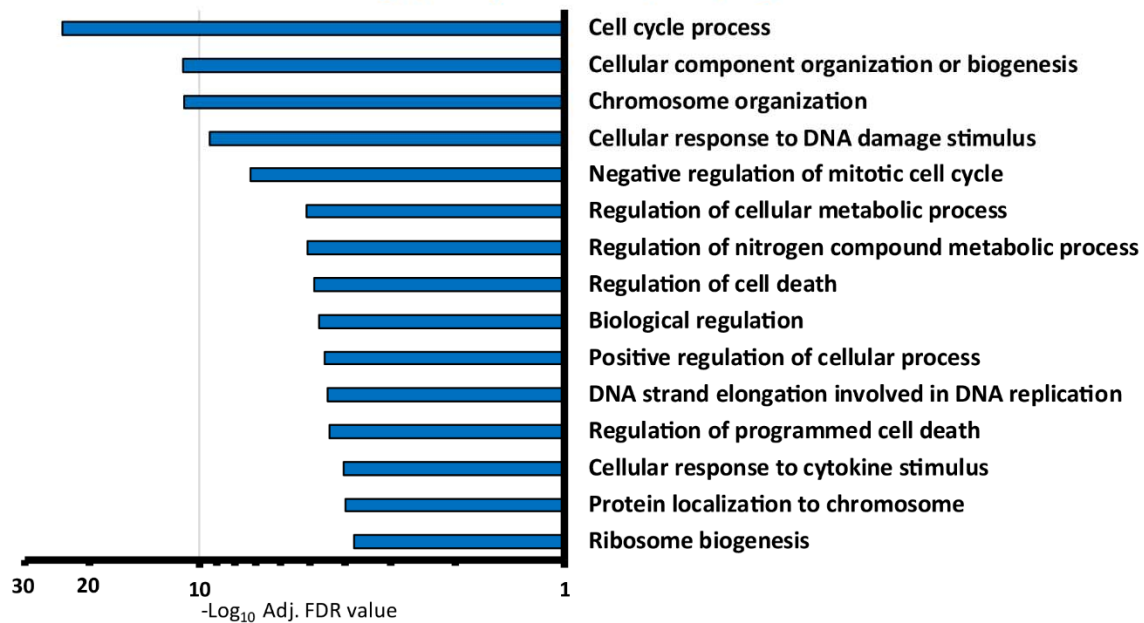

393

394 **Figure S5:** Gene ontology of Upregulated and Downregulated genes (Biological  
395 Processes). Processes are listed as  $-\log_{10}$  of adjusted FDR values. Top 15 relevant  
396 biological processes are chosen for generating the graphs.

397 **DISCUSSION**

398 The wound-healing literature involving epidermal keratinocytes have elegantly  
399 described many signaling pathways and gene expression profiles in the proliferating  
400 cells of the basal layer (36, 37). In contrast, differentiated epidermal cells, such as the  
401 suprabasal keratinocytes near the outer surface of the skin, have largely been  
402 overlooked for their potential role during wound-healing. Interestingly, our previous  
403 work demonstrates that the uppermost layer of differentiated keratinocytes, namely the  
404 granular layer, expresses caspase-8 that has a non-canonical role in regulating the  
405 wound-healing program (12). It was found that the downregulation of caspase-8 is both  
406 necessary and sufficient to induce a wound healing response in the absence of any  
407 tissue damage. In addition, the chronic downregulation of caspase-8 underlies  
408 inflammatory skin diseases such as atopic dermatitis (15) and psoriasis (38). These  
409 findings have made the decrease in caspase-8 expression a useful wound-healing  
410 biomarker and led us to inquire about the mechanism of caspase-8 regulation in skin  
411 keratinocytes.

412 Clues about the regulation of caspase-8 is reported in the context of cancer. Similar to  
413 the wound-healing process, it is generally downregulated in various cancers (18, 39,  
414 40). It is possible that the cancers, known as “over healing wound”, usurp physiological  
415 pathway of wound-healing for its own propagation (31). Here we show that wound-  
416 sensing leads to the acute increase in the caspase-8 promoter methylation as a  
417 potential mechanism of gene silencing. This parallels with the findings on caspase-8  
418 downregulation in hepatocellular carcinoma, where methylation status of SP1 sites and  
419 nearby CpG dinucleotides in the promoter region were proposed to be a major regulator  
420 of caspase-8 expression (19). In fact, it has been observed that caspase-8 and several  
421 other genes are known to be downregulated in various cancers via DNA  
422 methyltransferase (DNMT) activity (18, 39, 40). The overexpression of DNMT3a has  
423 also been shown to be associated with several cancers (41, 42)The process of de-novo  
424 DNA methylation during an acute physiological response such as wound healing is a  
425 rarely described phenomenon. Mammalian cells are known to have only two de-novo  
426 DNA methyltransferases, DNMT3a and DNMT3b. Both have been widely studied for  
427 their role in physiological processes like embryogenesis (43) and hematopoiesis (44),



428 as well as pathological conditions such as cancer (45, 46). In particular, , it has been  
429 shown that DNMT3a and 3b are required as regulators of enhancer activity and RNA  
430 production of genes necessary for epidermal stem cell homeostasis (4). In disease  
431 context, DNMT3a has been described to be overexpressed or mutated in various  
432 carcinomas (47, 48) and correlates with the downregulation of caspase-8 in these same  
433 scenarios. Here, we found that upon injury to the skin or differentiated epidermal  
434 sheets, the suprabasal cells near wound edge showed a nuclear localization of  
435 DNMT3a, but not DNMT3b. We have captured that DNMT3a indeed occupies the  
436 caspase-8 promoter and plays an important role in its downregulation post injury. In  
437 parallel to the DNA methylation, the literature also describes changes in histone  
438 modifications responsible for the ON/OFF state of a particular gene. The histone  
439 modifications and their modifiers have been studied in depth to understand how the  
440 expression of various epidermal differentiation genes are regulated (49). In general,  
441 H3K9ac, H3K4me3 are considered as gene activation marks and H3K9me3 and  
442 H3K27me3 are known as repression mark. It is also observed that certain methylation  
443 state of H3K36 dictates the DNMT3a's recruitment to a particular DNA segment on the  
444 chromosome (50, 51). In our efforts to understand the histone modifications during  
445 wound-healing, we observed a reduction in H3K9ac and H3K4me3 levels, along with an  
446 increase in the H3K9me3 mark at the caspase-8 promoter. These histone modifications  
447 are known to be regulated via various other epigenetic players such as Polycomb  
448 repressive complexes (PRC 1/2), JMJD, Setd8, and HDACs during epidermal  
449 development (49).

450 How these epigenetic players are regulated is another important question in the field.  
451 While there are many chemical cues, adhesion signals, and transcription factors  
452 described to regulate the wound-healing process, emerging evidence links mechanical  
453 forces to epigenetic and transcriptional responses (52, 53). Even during the  
454 development of epidermal tissue, tension generating molecular players like non-muscle  
455 myosin IIA (NMIIA), along with emerin (Emd) and PRC2 regulate the differentiation  
456 process of epidermal stem cells. The strain on epidermal cells reduces Emd levels from  
457 the inner nuclear membrane, which then leads to the loss of the histone mark  
458 H3K9me2,3. This is followed by Polycomb repressive complex 2 (PRC2) mediated

459 increase of H3K27me3 occupancy at several heterochromatic regions and thereby gene  
460 silencing (54). Along the same line, recently Nava et al. has described how short and  
461 long term mechanical stress on a cell can result in changes in stiffness of the nuclear  
462 membrane, loss of H3K9me3 marks at the heterochromatin and overall chromatin and  
463 cytoskeletal reorganization (55). These are some of the key discoveries suggesting  
464 external mechanical forces drive changes in heterochromatin organization, gene  
465 expression changes, and cytoskeletal reorganization in a way that mechanical energy  
466 gets redistributed and DNA damage can be avoided. In this context, our results  
467 demonstrate that the release in the mechanical tension, either by physical or chemical  
468 treatments, results in the DNMT3a's nuclear localization and downregulation of  
469 caspase-8. This observation is consistent with the concept of mechano-sensitive  
470 histone modifications, which could lay a foundation for the occupancy of DNMT3a. In a  
471 wider context of cellular reprogramming during the wound response,  
472 mechanotransduction seem to have a large impact on the transcriptome of the cell via  
473 the concomitant initiation of several epigenetic pathways. Future studies in this area will  
474 include elucidation of the connection between the release of mechanical tension and  
475 their sensing by these epigenetic machineries. For example, DNMT3a has been shown  
476 to have multiple binding partners (DNMT3L, SUMO-1, Cbx4, Ubc9, RP58, HDAC1) for  
477 their nuclear shuttling as well as chromosomal occupancy, some of which can  
478 potentially function as a primary signal sensor to guide the localization of DNMT3a (56,  
479 57). Moreover, in different cell types, changes in mechanical tension have been  
480 documented to directly induce the nuclear translocation of important transcription  
481 factors. A notable example of which is the YAP/TAZ complex, which has proliferation  
482 stimulating gene targets (58).

483 The described model of mechanosensitive epigenetic players would obviously be  
484 regulating a larger gene regulatory network, in addition to caspase-8. Interestingly the  
485 transcriptome literature on wound-healing has utilized proliferating keratinocytes,  
486 leaving the transcriptome profile of differentiated keratinocytes unknown despite the fact  
487 that it constitutes about 2/3 of the epidermis. Our research fills an important gap by  
488 providing a transcriptome profile of in vitro wounded differentiated keratinocytes. The  
489 results give us a unique insight in the regulation of various unexplored wound-response

490 genes. On a particular note, we observe a strong downregulation of multiple epidermal  
491 differentiation genes in response to injury. From the current transcriptome and literature  
492 survey it is evident that various keratinocyte differentiation markers (such as involucrin,  
493 keratins K1/K10, and filaggrin) are downregulated along with cell adhesion molecules  
494 (involved in tight junction, adherens junctions, and desmosomes). This is consistent  
495 with a report from S. Ghazizadeh's lab that de-differentiation of suprabasal  
496 keratinocytes is a contributing factor in the wound healing response (30). Our data  
497 suggests that the release of mechanical tension in differentiated keratinocytes is one  
498 component in this process by inducing a "partial de-differentiation" and perhaps  
499 additional soluble signaling cues are required to achieve complete dedifferentiation.

500 **Materials and Method:**

501

502 **Cell culture and scratch wound assay:**

503

504 The isolation of primary keratinocytes from neonatal mice was performed as described  
505 in (59). Briefly, mice pups were sacrificed and the skin was removed. The skin was kept  
506 in dispase at 4° C overnight (or 37 ° C for 1 hour) to separate epidermis. The epidermis  
507 was then digested with trypsin to isolate keratinocytes. These cells were filter with 70-  
508 micron mesh and cultured further as described in (Novak et al. 2009) (60). The  
509 keratinocytes were cultured in lab with feeder cells (3T3J2) for 10 passage. Then feeder  
510 independent keratinocytes were taken and tested for their differentiation potential via  
511 calcium switch protocol (61). Various differentiation markers were checked via qPCR.  
512 The batch of cells showing proper differentiation and morphology were then selected for  
513 further experiments.

514 Proliferating keratinocytes were maintained in low Ca<sup>2+</sup> E-media (0.05mM). For  
515 differentiation they were allowed to reach 100% confluence and then introduced with  
516 high Ca<sup>2+</sup> (1.2mM) E-media for 48 hrs. Once they differentiated and appear as sheet-  
517 like morphology, scratch-wounds were made (with the help of a 1ml tip) at multiple sites  
518 in each culture plate. To keep the constancy between experiments, the distance  
519 between the consecutive scratch was kept approximately 0.5 mm. The scratch wounds  
520 were followed by a 1X PBS wash, and fresh high Ca<sup>2+</sup> (1.2mM) E-media were added to  
521 each plate. As described in the figure legends, the cells were harvested at several time  
522 points using TRIzol reagent for RNA isolation or using lysis buffer for DNA isolation.

523

524 **Mice:**

525

526 C57Bl6/J animals were originally purchased from Jackson Laboratory (Stock No.  
527 000664) and were bred for > 10 generations in the NCBS vivarium facility. 8-week-old  
528 mice were anesthetised and 5 mm or 8 mm punch biopsies were used to make full-  
529 thickness excisional wounds.

530

531 **Tissue Section and Staining:**

532

533 Wounded regions were embedded in OCT, frozen on dry ice, and stored in -80° freezer  
534 for further sectioning and antibody staining. 10-15 micron section were taken, stained  
535 with primary antibody at 4° C overnight, and then with secondary antibody at RT for 20-  
536 30 minutes. Antibodies used in this study are as following; Caspase-8 (Enzo #ALX-804-  
537 447-C100), DNMT3a (abcam #ab2850, SC #365769), K5 (lab generated). Sections  
538 were imaged using IX73 Olympus microscope.

539

540 **In-situ hybridisation:**

541

542 DIG labelled 5' mouse caspase-8 cRNA probe was synthesized as per the  
543 manufactures instructions (Roche dig labelling kit – # 11175025910). In situ  
544 hybridisation was performed as described earlier (62). Briefly, the paraffin tissue  
545 sections were deparaffinised by treatment by xylene and ethanol gradient, or the  
546 4%PFA fixed cells were permeabilized using 0.2% TritonX-100 for 10 minutes at room  
547 temperature. 5ng DIG labelled cRNA probes per 100uL hybridisation buffer was applied  
548 on the sections overnight at 63°C. Same concentration of DIG labelled mRNA with the  
549 complimentary sequence to cRNA was used as a negative control. Washing was done  
550 at 65°C. The Anti-DIG antibody (Roche # 11093274910 Roche) was applied overnight  
551 as per manufacturer's instructions. Sections were developed for 30 minutes at 37°C  
552 using BCIP/NBT solution (Sigma # B6404). Reaction was stopped using de-ionised  
553 water once the purple colour was developed. Sections were mounted using MOWIOL  
554 solution and imaged using bright-field microscope.

555

556 **Hydrogel of varying stiffness:**

557

558 The polyacrylamide based hydrogels were prepared as describe in (63) and (64). They  
559 were coated with collagen and seeded with enough cells to make it 80-100% confluent,  
560 and were allowed to settle for 24-48 hr before initiating the keratinocyte differentiation.

561

562 **Chromatin Immunoprecipitation (ChIP):**

563

564 ChIP of histone modification was performed as described previously (65) with some  
565 modifications. In brief, harvested keratinocytes (unscratched and scratched) were  
566 cross-linked with 1% formaldehyde. Cells were lysed in buffer N containing DTT,  
567 PMSF, and 0.3% NP-40. After isolation of nuclei, chromatin fractionation was done  
568 using 0.4 U of MNase (N5386, Sigma) at 37°C for 10 min. Reaction was stopped using  
569 MNase stop buffer without proteinase K. Simultaneously, antibodies against  
570 H3K27me3, H3K9me3, H3K4me3, H3K9ac and Rabbit IgG were kept for binding with  
571 Dynabeads for 2 hr at RT. After equilibration of beads, chromatin was added for  
572 pre-clearing. To antibody bound beads, pre-cleared chromatin was added and kept for  
573 IP at 4°C overnight. Next day, beads were washed and eluted at 65°C for 5 min. Eluted  
574 product was subjected to reverse cross-linking along with input samples, first with  
575 RNase A at 65°C overnight and then with Proteinase K at 42°C for 2 h. After reverse  
576 cross-linking, DNA purification was performed using phenol:chloroform extraction  
577 method. Antibodies used for this protocol are listed here:

| <i>Antibody</i> | <i>Cat #</i> | <i>Company</i> |
|-----------------|--------------|----------------|
| H3K27me3        | 07-449       | Millipore      |
| H3K9me3         | ab8898       | abcam          |
| H3K9ac          | ab4441       | abcam          |
| H3K4me3         | ab8580       | abcam          |

578

579 **Bisulphite reaction, sequencing, and analysis:**

580

581 Genomic DNA was isolated by salting out method as described elsewhere (66), then  
582 treated with RNase for 1 hour at 37° C. Further, ~ 20 microgram DNA was taken in 200  
583 microliter volume and purified with phenol:chloroform extraction method. The purified  
584 DNA was checked for its integrity via running on the agarose gel. The DNA sample  
585 having good integrity and free of RNA were taken for bisulphite conversion as per  
586 manufacturer's protocol (Zymo #D5005). The converted DNA was then amplified using

587 bisulphite conversion specific primers, the amplified product was assessed on the  
588 agarose gel, ligated with TOPO-TA vector.

589 and then sent for Sanger's sequencing. caspase-8 promoter - for bisulphite  
590 sequencing (GAATAAGGAAGTGTTTTTTAG, AAAACTATACTCACTTCCTATTC). The  
591 sequenced file (FASTA) was uploaded to <http://quma.cdb.riken.jp/> for CpG methylation  
592 analysis.

593

#### 594 **Lentivirus shRNA constructs and transduction:**

595

596 Plasmids expressing shRNAs were obtained from TransOmics (DNMT3a #  
597 TLMSU1400). To produce viruses, HEK293T cells were transfected with psPAX2,  
598 pMD2.G, and either non targeting random RNA sequence vector or shRNA- containing  
599 plasmids, using Lipofectamine® LTX & PLUS transfection reagents according to the  
600 manufacturer's protocol. Following a 48-72 hr transfection, the virus particle-containing  
601 media was collected, concentrated with filters, and added to the differentiated cells for  
602 24 hr. Expression of DNMT3a was measured two to three days after viral infection.  
603 Silencing efficiency was confirmed by immunoblotting.

604

#### 605 **Quantitative Real Time PCR:**

606

607 RNA was isolated from human keratinocytes (proliferating or differentiated) using the  
608 RNAiso Plus (Takara). 1 µg of RNA was used to prepare cDNA using the PrimeScript  
609 kit (Takara). cDNA equivalent to 100 ng of RNA was used for setting up the qPCR  
610 reaction using the SYBR green 2x master mix. All reactions were performed in  
611 technical triplicates using the CFX384 Touch Real time PCR detection system (BioRad).  
612 Primers used in this study are listed here: caspase-8 mRNA  
613 (TCTGCTGGGAATGGCTACGGTGAA, GTGTGAAGGTGGGCTGTGGCATCT),  
614 caspase-8 promoter (GGGAATAAGGAAGTGTCCTCCA,  
615 CCCAGAACTGTACTCACTTCCTG), beta Actin (GGGCTATGCTCTCCCTCAC,  
616 GATGTCACGCACGATTTCC)

617

618 **RNA Sequencing and data analysis:**

619

620 The scratch wounded cells and controls were collected after 8 hours in TRIzol reagent  
621 and RNA was isolated using standard TRIzol based RNA isolation method. The library  
622 preparation and NGS RNA sequencing steps were outsourced to a commercial facility  
623 (Genotypic). Once the raw sequencing reads were received, sequencing data analysis  
624 was performed using the following analysis pipeline. Briefly, raw sequencing data was  
625 QC checked with the “FASTQC” tool (Babraham Bioinformatics). Adapter contamination  
626 and bad quality reads were trimmed using “Trimmomatic” tool (67). The good quality  
627 reads were then mapped to mm10 (mouse) reference genome using “HISAT2” (68).  
628 The resulting “SAM” outputs were converted to “BAM” output and sorted. The “HTSeq-  
629 Count” tool was used to generate expression matrix from all four samples. Then,  
630 differential expression was analysed with the help of DESeq2 R package.

631

632 **Gene Ontology Enrichment Analysis:**

633

634 To explore enrichment of Gene Ontology among the significantly down regulated (n =  
635 428) and up regulated genes (n = 358) we have used <http://geneontology.org/> resources  
636 which runs “PANTHER” for the enrichment analysis (69).

637 Additional details of the NGS RNA seq samples are given here:

| Sample Names    | Raw Sequencing read counts | Good quality read counts (Used for mapping to mm10 reference genome) | 638 |
|-----------------|----------------------------|----------------------------------------------------------------------|-----|
| Control-1       | 33693828                   | 30441624                                                             | 639 |
| Control-2       | 34605485                   | 30973898                                                             | 640 |
| Scratch-wound-1 | 32255293                   | 27735961                                                             | 641 |
| Scratch-wound-2 | 31056628                   | 27761854                                                             | 642 |
|                 |                            |                                                                      | 643 |

644

645

646

647



648 **ACKNOWLEDGEMENTS**

649 The authors would like to thank Prof. Apurva Sarin, Prof. Tapas Kundu, Prof. Sudhir  
650 Krishna and Jamora Lab members for their critical review of the work and insightful  
651 discussions. This work was supported by grants to C.J. from the Department of  
652 Biotechnology of the Government of India (BT/PR8738/AGR/36/770/2013 and  
653 DBT/PR32539/BRB/ 10/1814/2019); and inStem Core funds. TB was supported by  
654 PhD scholarship from Council of Scientific & Industrial Research (CSIR). We thank the  
655 staff of the NCBS Central Imaging and Flow Cytometry Facility (CIFF) for help with  
656 image acquisition. Animal work in the NCBS/inStem Animal Care and Resource Center  
657 was partially supported by the National Mouse Research Resource (NaMoR) grant #  
658 DBT/PR5981 /MED/31/181/2012;2013-2016 & 102/IFD/SAN/5003/2017-2018 from the  
659 Indian Department of Biotechnology

660

661

662 **Author Contributions**

663 Conceptualization, T.B. and C.J.; Methodology, T.B., C.J.; Investigation, T.B., R.D.,  
664 A.M.H., A.A.K., A.J.P., A.P.D; Writing – Original Draft, T.B., C.J.; Writing – Review &  
665 Editing, T.B., C.J.; Funding Acquisition, C.J. and S.R.; Resources, C.J., and S.R.;  
666 Supervision, T.B., C.J., S.R.

667

668 **Declaration of Interests**

669 The authors declare no conflict of interest

670

671

672

673

674

675 REFERENCES

676

- 677 1. T. J. Shaw, P. Martin, Wound repair: A showcase for cell plasticity and migration.  
678 *Curr. Opin. Cell Biol.* **42**, 29–37 (2016).
- 679 2. M. A. Troester, *et al.*, Activation of Host Wound Responses in Breast Cancer  
680 Microenvironment. *Clin. Cancer Res.* **15**, 7020–7028 (2009).
- 681 3. C. J. Lewis, A. N. Mardaryev, A. A. Sharov, M. Y. Fessing, V. A. Botchkarev, The  
682 Epigenetic Regulation of Wound Healing. *Adv. wound care* **3**, 468–475 (2014).
- 683 4. L. Rinaldi, *et al.*, Dnmt3a and Dnmt3b Associate with Enhancers to Regulate  
684 Human Epidermal Stem Cell Homeostasis (Elsevier, 2016).
- 685 5. Q. Shen, H. Jin, X. Wang, Epidermal Stem Cells and Their Epigenetic Regulation.  
686 *Int. J. Mol. Sci.* **14**, 17861 (2013).
- 687 6. D. Orioli, E. Dellambra, Epigenetic Regulation of Skin Cells in Natural Aging and  
688 Premature Aging Diseases. *Cells* **7**, 268 (2018).
- 689 7. L. Cooper, C. Johnson, F. Burslem, P. Martin, Wound healing and inflammation  
690 genes revealed by array analysis of “macrophageless” PU.1 null mice. *Genome*  
691 *Biol.* (2005) <https://doi.org/10.1186/gb-2004-6-1-r5>.
- 692 8. T. Shaw, P. Martin, Epigenetic reprogramming during wound healing: loss of  
693 polycomb-mediated silencing may enable upregulation of repair genes. *EMBO*  
694 *Rep.* **10**, 881–6 (2009).
- 695 9. A. Totaro, T. Panciera, S. Piccolo, YAP/TAZ upstream signals and downstream  
696 responses. *Nat. Cell Biol.* **20**, 888 (2018).
- 697 10. R. Yang, *et al.*, Epidermal stem cells in wound healing and their clinical  
698 applications. *Stem Cell Res. Ther.* 2019 101 **10**, 1–14 (2019).
- 699 11. M. Senoo, Epidermal Stem Cells in Homeostasis and Wound Repair of the Skin.  
700 *Adv. Wound Care* **2**, 273 (2013).
- 701 12. P. Lee, *et al.*, Dynamic expression of epidermal caspase 8 simulates a wound  
702 healing response. *Nature* **458**, 519–23 (2009).
- 703 13. P. Lee, *et al.*, Stimulation of hair follicle stem cell proliferation through an IL-1  
704 dependent activation of  $\gamma\delta$ T-cells. *Elife* **6** (2017).
- 705 14. S. Ghosh, *et al.*, Extracellular caspase-1 regulates hair follicle stem cell migration

- 706 during wound-healing. *bioRxiv*, 548529 (2020).
- 707 15. C. Li, *et al.*, Development of atopic dermatitis-like skin disease from the chronic  
708 loss of epidermal caspase-8. *Proc. Natl. Acad. Sci. U. S. A.* **107**, 22249–22254  
709 (2010).
- 710 16. T. Bhatt, *et al.*, Sustained Secretion of the Antimicrobial Peptide S100A7 Is  
711 Dependent on the Downregulation of Caspase-8. *Cell Rep.* **29**, 2546-2555.e4  
712 (2019).
- 713 17. S. Fulda, Caspase-8 in cancer biology and therapy. *Cancer Lett.* **281**, 128–133  
714 (2009).
- 715 18. D. G. Stupack, Caspase-8 as a therapeutic target in cancer. *Cancer Lett.* **332**,  
716 133–40 (2013).
- 717 19. C. Liedtke, *et al.*, Silencing of caspase-8 in murine hepatocellular carcinomas is  
718 mediated via methylation of an essential promoter element. *Gastroenterology*  
719 **129**, 1602–15 (2005).
- 720 20. L. Rinaldi, *et al.*, Loss of Dnmt3a and Dnmt3b does not affect epidermal  
721 homeostasis but promotes squamous transformation through PPAR- $\gamma$ . *Elife* **6**  
722 (2017).
- 723 21. M. Lawrence, S. Daujat, R. Schneider, Lateral Thinking: How Histone  
724 Modifications Regulate Gene Expression. *Trends Genet.* **32**, 42–56 (2016).
- 725 22. J. Du, L. M. Johnson, S. E. Jacobsen, D. J. Patel, DNA methylation pathways and  
726 their crosstalk with histone methylation. *Nat. Rev. Mol. Cell Biol.* **16**, 519–32  
727 (2015).
- 728 23. A. D. King, *et al.*, Reversible Regulation of Promoter and Enhancer Histone  
729 Landscape by DNA Methylation in Mouse Embryonic Stem Cells. *Cell Rep.* **17**,  
730 289–302 (2016).
- 731 24. X. Guo, *et al.*, Structural insight into autoinhibition and histone H3-induced  
732 activation of DNMT3A. *Nature* **517**, 640–4 (2015).
- 733 25. P. Voigt, W.-W. Tee, D. Reinberg, A double take on bivalent promoters. *Genes*  
734 *Dev.* **27**, 1318–38 (2013).
- 735 26. X. Trepast, *et al.*, Physical forces during collective cell migration. *Nat. Phys.* **5**,  
736 426–430 (2009).

- 737 27. T. Lecuit, A. S. Yap, E-cadherin junctions as active mechanical integrators in  
738 tissue dynamics. *Nat. Cell Biol.* **17**, 533–539 (2015).
- 739 28. D. E. Leckband, J. de Rooij, Cadherin Adhesion and Mechanotransduction. *Annu.*  
740 *Rev. Cell Dev. Biol.* **30**, 291–315 (2014).
- 741 29. B. Jackson, *et al.*, RhoA is dispensable for skin development, but crucial for  
742 contraction and directed migration of keratinocytes. *Mol. Biol. Cell* **22**, 593–605  
743 (2011).
- 744 30. J. Mannik, K. Alzayady, S. Ghazizadeh, Regeneration of multilineage skin  
745 epithelia by differentiated keratinocytes. *J. Invest. Dermatol.* **130**, 388–397 (2010).
- 746 31. M. Schäfer, S. Werner, Cancer as an overheating wound: an old hypothesis  
747 revisited. *Nat. Rev. Mol. Cell Biol.* **9**, 628–38 (2008).
- 748 32. E. M, S. L, W. O, S. W, Promoter methylation pattern of caspase-8, P16INK4A,  
749 MGMT, TIMP-3, and E-cadherin in medulloblastoma. *Pathol. Oncol. Res.* **10**, 17–  
750 21 (2004).
- 751 33. Y. Wu, M. Alvarez, D. J. Slamon, P. Koeffler, J. V Vadgama, Caspase 8 and  
752 maspin are downregulated in breast cancer cells due to CpG site promoter  
753 methylation. *BMC Cancer* **10**, 32 (2010).
- 754 34. S. Cho, *et al.*, Epigenetic methylation and expression of caspase 8 and survivin in  
755 hepatocellular carcinoma. *Pathol. Int.* **60**, 203–211 (2010).
- 756 35. E. Hervouet, F. M. Vallette, P.-F. Cartron, Impact of the DNA methyltransferases  
757 expression on the methylation status of apoptosis-associated genes in  
758 glioblastoma multiforme. *Cell Death Dis.* **1**, 1–9 (2010).
- 759 36. I. Pastar, *et al.*, Epithelialization in Wound Healing: A Comprehensive Review.  
760 *Adv. Wound Care* **3**, 445–464 (2014).
- 761 37. G. K. Patel, C. H. Wilson, K. G. Harding, A. Y. Finlay, P. E. Bowden, Numerous  
762 keratinocyte subtypes involved in wound re-epithelialization. *J. Invest. Dermatol.*  
763 **126**, 497–502 (2006).
- 764 38. T. Bhatt, *et al.*, Sustained Secretion of the Antimicrobial Peptide S100A7 Is  
765 Dependent on the Downregulation of Caspase-8. *Cell Rep.* **29**, 2546-2555.e4  
766 (2019).
- 767 39. A. Nakagawara, *et al.*, High levels of expression and nuclear localization of

- 768 interleukin-1 beta converting enzyme (ICE) and CPP32 in favorable human  
769 neuroblastomas. *Cancer Res.* **57**, 4578–84 (1997).
- 770 40. D. Subramaniam, R. Thombre, A. Dhar, S. Anant, DNA Methyltransferases: A  
771 Novel Target for Prevention and Therapy. *Front. Oncol.* **4**, 80 (2014).
- 772 41. D. He, *et al.*, DNMT3A/3B overexpression might be correlated with poor patient  
773 survival, hypermethylation and low expression of ESR1/PGR in endometrioid  
774 carcinoma: An analysis of the Cancer Genome Atlas. *Chin. Med. J. (Engl)*. **132**,  
775 161–170 (2019).
- 776 42. I. Kataoka, *et al.*, DNMT3A overexpression is associated with aggressive behavior  
777 and enteroblastic differentiation of gastric adenocarcinoma. *Ann. Diagn. Pathol.*  
778 **44**, 151456 (2020).
- 779 43. J.-Y. Li, *et al.*, Synergistic Function of DNA Methyltransferases Dnmt3a and  
780 Dnmt3b in the Methylation of Oct4 and Nanog. *Mol. Cell. Biol.* (2007)  
781 <https://doi.org/10.1128/mcb.01380-07>.
- 782 44. G. A. Challen, *et al.*, Dnmt3a and Dnmt3b have overlapping and distinct functions  
783 in hematopoietic stem cells. *Cell Stem Cell* (2014)  
784 <https://doi.org/10.1016/j.stem.2014.06.018>.
- 785 45. W. Zhang, J. Xu, DNA methyltransferases and their roles in tumorigenesis.  
786 *Biomark. Res.* (2017) <https://doi.org/10.1186/s40364-017-0081-z>.
- 787 46. K. D. Robertson, DNA methylation, methyltransferases, and cancer. *Oncogene*  
788 (2001) <https://doi.org/10.1038/sj.onc.1204341>.
- 789 47. R. E. Husni, *et al.*, DNMT3a expression pattern and its prognostic value in lung  
790 adenocarcinoma. *Lung Cancer* **97**, 59–65 (2016).
- 791 48. H. R. Davies, *et al.*, Epigenetic modifiers DNMT3A and BCOR are recurrently  
792 mutated in CYLD cutaneous syndrome. *Nat. Commun.* **10**, 1–9 (2019).
- 793 49. J. Zhang, E. Bardot, E. Ezhkova, Epigenetic regulation of skin: Focus on the  
794 Polycomb complex. *Cell. Mol. Life Sci.* **69**, 2161–2172 (2012).
- 795 50. K.-M. Noh, *et al.*, Engineering of a Histone-Recognition Domain in Dnmt3a Alters  
796 the Epigenetic Landscape and Phenotypic Features of Mouse ESCs. *Mol. Cell*  
797 (2018) <https://doi.org/10.1016/j.molcel.2018.01.014>.
- 798 51. D. N. Weinberg, *et al.*, The histone mark H3K36me2 recruits DNMT3A and

- 799 shapes the intergenic DNA methylation landscape. *Nature* **573**, 281–286 (2019).
- 800 52. B. Kuehlmann, C. A. Bonham, I. Zucal, L. Prantl, G. C. Gurtner,  
801 Mechanotransduction in Wound Healing and Fibrosis. *J. Clin. Med.* **9**, 1423  
802 (2020).
- 803 53. S. Li, D. Yang, L. Gao, Y. Wang, Q. Peng, Epigenetic regulation and  
804 mechanobiology. *Biophys. Reports* **6**, 33–48 (2020).
- 805 54. H. Q. Le, *et al.*, Mechanical regulation of transcription controls Polycomb-  
806 mediated gene silencing during lineage commitment. *Nat. Cell Biol.* **18**, 864–875  
807 (2016).
- 808 55. M. M. Nava, *et al.*, Heterochromatin-Driven Nuclear Softening Protects the  
809 Genome against Mechanical Stress-Induced Damage. *Cell* (2020)  
810 <https://doi.org/10.1016/j.cell.2020.03.052>.
- 811 56. Y. Ling, *et al.*, Modification of de novo DNA methyltransferase 3a (Dnmt3a) by  
812 SUMO-1 modulates its interaction with histone deacetylases (HDACs) and its  
813 capacity to repress transcription. *Nucleic Acids Res.* **32**, 598–610 (2004).
- 814 57. B. Li, *et al.*, Polycomb protein Cbx4 promotes SUMO modification of de novo DNA  
815 methyltransferase Dnmt3a. *Biochem. J.* **405**, 369–378 (2007).
- 816 58. E. Rognoni, G. Walko, The Roles of YAP/TAZ and the Hippo Pathway in Healthy  
817 and Diseased Skin. *Cells* **8**, 411 (2019).
- 818 59. F. Li, C. A. Adase, L. J. Zhang, Isolation and culture of primary mouse  
819 keratinocytes from neonatal and adult mouse skin. *J. Vis. Exp.* **2017**, 56027  
820 (2017).
- 821 60. J. A. Nowak, E. Fuchs, Isolation and culture of epithelial stem cells. *Methods Mol.*  
822 *Biol.* (2009) [https://doi.org/10.1007/978-1-59745-060-7\\_14](https://doi.org/10.1007/978-1-59745-060-7_14).
- 823 61. D. D. Bikle, Z. Xie, C.-L. Tu, Calcium regulation of keratinocyte differentiation.  
824 *Expert Rev. Endocrinol. Metab.* **7**, 461–472 (2012).
- 825 62. J. Wu, J. Q. Feng, X. Wang, “In situ hybridization on mouse paraffin sections  
826 using DIG-labeled RNA probes” in *Methods in Molecular Biology*, (Humana Press  
827 Inc., 2019), pp. 163–171.
- 828 63. J. R. Tse, A. J. Engler, Preparation of hydrogel substrates with tunable  
829 mechanical properties. *Curr. Protoc. Cell Biol.* (2010)

- 830 <https://doi.org/10.1002/0471143030.cb1016s47>.
- 831 64. S. Syed, A. Karadaghy, S. Zustiak, Simple polyacrylamide-based multiwell  
832 stiffness assay for the study of stiffness-dependent cell responses. *J. Vis. Exp.*  
833 **2015** (2015).
- 834 65. M. Brand, S. Rampalli, C. P. Chaturvedi, F. J. Dilworth, Analysis of epigenetic  
835 modifications of chromatin at specific gene loci by native chromatin  
836 immunoprecipitation of nucleosomes isolated using hydroxyapatite  
837 chromatography. *Nat. Protoc.* (2008) <https://doi.org/10.1038/nprot.2008.8>.
- 838 66. S. A. Miller, D. D. Dykes, H. F. Polesky, A simple salting out procedure for  
839 extracting DNA from human nucleated cells. *Nucleic Acids Res.* **16**, 1215 (1988).
- 840 67. A. M. Bolger, M. Lohse, B. Usadel, Trimmomatic: A flexible trimmer for Illumina  
841 sequence data. *Bioinformatics* **30**, 2114–2120 (2014).
- 842 68. D. Kim, B. Langmead, S. L. Salzberg, HISAT: A fast spliced aligner with low  
843 memory requirements. *Nat. Methods* **12**, 357–360 (2015).
- 844 69. P. D. Thomas, *et al.*, PANTHER: A library of protein families and subfamilies  
845 indexed by function. *Genome Res.* (2003) <https://doi.org/10.1101/gr.772403>.
- 846
